# Supplementary material for: The nuclear GUCT domain-containing DEAD-box RNA helicases govern gametophytic and sporophytic development in Physcomitrium patens
Source: Springer Nature journal article supplement (doi:10.1007/s11103-021-01152-w), 2021-04-22
Supplement: MOESM1 [file 11103_2021_1152_MOESM1_ESM.pdf]

## Supplementary Material

Article title: **The nuclear GUCT domain-containing DEAD-box RNA helicases govern gametophytic and sporophytic development in *Physcomitrium patens*.**

Authors: Pierre-François Perroud<sup>1,a</sup>, Viktor Demko<sup>2,3</sup>, Ako Eugene Ako<sup>4,b</sup>, Rajendra Khanal<sup>4,c</sup>, Boris Bokor<sup>5</sup>, Andrej Pavlovič<sup>6</sup>, Ján Jásik<sup>3</sup> and Wenche Johansen<sup>4\*</sup>

The following supporting information is available for this article:

- Table S1** Comparison of *PpRH1* and *PpRH2* exon structure
- Table S2** List of DEAD-box RNA helicases used in the present study
- Table S3** List of primers used in the study and their sequences
- Result S1** Establishment and molecular characterizations of the *P. patens*  $\Delta rh1$ ,  $\Delta rh2$ ,  $\Delta rh1/2$  and *rh1-3xgfp* mutants
- Fig S1** Phylogenetic tree of the DEAD-box RNA helicases core domain
- Fig S2** *PpRH1* and *PpRH2* expression profiles in *P. patens* tissues as presented by the eFP browser
- Fig S3** Targeted insertion and PCR genotyping of the *P. patens* *rh1-3xgfp* mutant line
- Fig S4** Comparison of the GFP fluorescent signal between *rh1-3xgfp* and wildtype protonema
- Fig S5** Targeted insertion and molecular characterization of the *P. patens*  $\Delta rh1$ ,  $\Delta rh2$ ,  $\Delta rh1/2$  and  $\Delta rh2/cre$  mutant lines
- Fig S6** Long-term effect of reduced light on WT compared to *PpRH1* and *PpRH2* deletion mutant gametophores
- Fig S7** Vegetative growth under low light
- Fig S8** Vegetative growth under high light
- Fig S9** Vegetative growth on 90 mM NaCl containing medium
- Fig S10** Quantitative PCR analysis of *PpRH1* and *PpRH2* after ABA and cold treatment
- Fig S11** Chlorophyll a fluorescence imaging and quantification
- Fig S12**  $\Delta rh2$  spores display a reduced germination rate compared to WT and  $\Delta rh1$

**Fig S13** Mature  $\Delta rh2$  spores display an heterogeneous shape and size compared to WT and  $\Delta rh1$  spores

**Fig S14** Cartoon of the plasmid constructs used to generate the *P. patens*  $\Delta rh1$ ,  $\Delta rh2$ ,  $\Delta rh1/2$  and *rh1-3xgfp* mutant lines



## Supplementary Table S1

Comparison of *PpRH1* and *PpRH2* exon structure

|                        | <i>PpRH1</i> | <i>PpRH2</i> |
|------------------------|--------------|--------------|
| <b>Gene size</b>       | 3989 bp      | 4150 bp      |
| <b>Genetic element</b> | <b>bp</b>    |              |
| Exon 1                 | 492          | 492          |
| Exon 2                 | 129          | 129          |
| Exon 3                 | 141          | 141          |
| Exon 4                 | 112          | 112          |
| Exon 5                 | 71           | 71           |
| Exon 6                 | 375          | 375          |
| Exon 7                 | 759          | 768          |
| Intron 1               | 262          | 382          |
| Intron 2               | 134          | 150          |
| Intron 3               | 124          | 124          |
| Intron 4               | 130          | 128          |
| Intron 5               | 223          | 188          |
| Intron 6               | 124          | 105          |
| 5'UTR                  | 392          | 444          |
| 3'UTR                  | 521          | 541          |

Data based on annotations provide in Phytozome Release v.12.1 (*Physcomitrium patens* v3.3). *PpRH1* (Pp3c20\_20710); *PpRH2* (Pp3c10\_20840).

**Table S2** List of DEAD-box RNA helicases used in the present study

|                             | <b>Gene ID</b>          | <b>Domain structure</b>      | <b>Size (aa)</b> |
|-----------------------------|-------------------------|------------------------------|------------------|
| <b>ARABIDOPSIS THALIANA</b> | AT4G16630               | DEAD-helicase_C              | 789              |
|                             | AT1G71370               | DEAD-helicase_C-DUF4217      | 558              |
|                             | AT3G22310               | DEAD-helicase_C              | 610              |
|                             | <b>AT5G26742</b>        | DEAD-helicase_C-GUCT-Zf_CCHC | 747              |
|                             | AT5G63120               | DEAD-helicase_C              | 482              |
|                             | AT2G42520               | DEAD-helicase_C              | 633              |
|                             | AT2G01440               | DEAD-helicase_C              | 973              |
|                             | AT5G60990               | DEAD-helicase_C              | 456              |
|                             | AT3G22330               | DEAD-helicase_C              | 616              |
|                             | AT5G65900               | DEAD-helicase_C-DUF4217      | 633              |
|                             | AT3G18600               | DEAD-helicase_C-DUF4217      | 568              |
|                             | AT1G16280               | DEAD-helicase_C              | 491              |
|                             | AT3G16840               | DEAD-helicase_C              | 827              |
|                             | AT3G01540               | WW-DEAD-helicase_C           | 618              |
|                             | AT2G40700               | DEAD-helicase_C-DUF4217      | 610              |
|                             | AT2G33730               | DEAD-helicase_C              | 733              |
|                             | AT1G55150               | DEAD-helicase_C              | 501              |
|                             | AT5G14610               | WW-DEAD-helicase_C           | 645              |
|                             | AT1G77030               | DEAD-helicase_C-DBP10CT      | 845              |
|                             | AT5G08620               | DEAD-helicase_C              | 563              |
|                             | AT3G06480               | WW-DEAD-helicase_C           | 1088             |
|                             | AT3G58570               | DEAD-helicase_C              | 646              |
|                             | AT3G58510               | DEAD-helicase_C              | 612              |
|                             | AT4G09730               | DEAD-helicase_C              | 621              |
|                             | AT1G28180               | DEAD-helicase_C              | 368              |
|                             | AT1G72730               | DEAD-helicase_C              | 414              |
|                             | AT4G00660               | DEAD-helicase_C              | 505              |
|                             | AT5G05450               | DEAD-helicase_C-DUF4217      | 593              |
|                             | AT3G13920               | DEAD-helicase_C              | 407              |
|                             | AT5G63630               | DEAD-helicase_C              | 522              |
|                             | AT3G61240               | DEAD-helicase_C              | 498              |
|                             | AT5G08610               | DEAD-helicase_C              | 850              |
|                             | AT1G63250               | DEAD-helicase_C              | 798              |
|                             | AT1G31970               | DEAD-helicase_C              | 537              |
|                             | AT2G47330               | DEAD-helicase_C              | 760              |
|                             | AT1G20920               | DEAD-helicase_C              | 828              |
| AT5G54910                   | DEAD-helicase_C-DUF4217 | 739                          |                  |
| AT5G51280                   | DEAD-helicase_C         | 1166                         |                  |
| AT2G07750                   | DEAD-helicase_C         | 845                          |                  |

|                             |                  |                              |      |
|-----------------------------|------------------|------------------------------|------|
|                             | AT2G45810        | DEAD-helicase_C              | 528  |
|                             | AT1G54270        | DEAD-helicase_C              | 407  |
|                             | AT4G33370        | DEAD-helicase_C              | 542  |
|                             | AT3G09620        | DEAD-helicase_C              | 990  |
|                             | AT1G71280        | DEAD-helicase_C-DUF4217      | 465  |
|                             | AT4G34910        | DEAD-helicase_C              | 626  |
|                             | AT3G53110        | DEAD-helicase_C              | 496  |
|                             | AT1G59990        | DEAD-helicase_C              | 567  |
|                             | <b>AT5G62190</b> | DEAD-helicase_C-GUCT         | 671  |
| <b>SOLANUM LYCOPERSICUM</b> | SIDEAD1          | DEAD-helicase_C              | 605  |
|                             | SIDEAD2          | DEAD-helicase_C              | 1222 |
|                             | SIDEAD3          | DEAD-helicase_C              | 775  |
|                             | SIDEAD4          | DEAD-helicase_C              | 499  |
|                             | SIDEAD5          | DEAD-helicase_C              | 871  |
|                             | SIDEAD6          | DEAD-helicase_C              | 663  |
|                             | SIDEAD7          | DEAD-helicase_C              | 586  |
|                             | SIDEAD8          | DEAD-helicase_C-DUF4217      | 595  |
|                             | SIDEAD9          | DEAD-helicase_C              | 654  |
|                             | SIDEAD10         | WW-DEAD-helicase_C           | 707  |
|                             | SIDEAD11         | DEAD-helicase_C              | 613  |
|                             | SIDEAD12         | DEAD-helicase_C              | 652  |
|                             | SIDEAD13         | DEAD-helicase_C-DUF4217      | 567  |
|                             | SIDEAD14         | DEAD-helicase_C-Zf_CCHC      | 596  |
|                             | SIDEAD15         | DEAD-helicase_C              | 745  |
|                             | SIDEAD16         | DEAD-helicase_C              | 500  |
|                             | SIDEAD17         | DEAD-helicase_C              | 560  |
|                             | SIDEAD18         | DEAD-helicase_C              | 538  |
|                             | SIDEAD19         | DEAD-helicase_C              | 414  |
|                             | SIDEAD20         | DEAD-helicase_C-Zf_CCHC      | 596  |
|                             | SIDEAD21         | DEAD-helicase_C              | 414  |
|                             | SIDEAD22         | DEAD-helicase_C-DUF4217      | 598  |
|                             | SIDEAD23         | DEAD-helicase_C              | 631  |
|                             | SIDEAD24         | DEAD-helicase_C-DUF4217      | 755  |
|                             | <b>SIDEAD25</b>  | DEAD-helicase_C-GUCT-Zf_CCHC | 747  |
|                             | SIDEAD26         | DEAD-helicase_C              | 414  |
|                             | SIDEAD27         | DEAD-helicase_C              | 554  |
|                             | SIDEAD28         | DEAD-helicase_C              | 559  |
|                             | SIDEAD29         | DEAD-helicase_C              | 800  |
|                             | SIDEAD30         | DEAD-helicase_C              | 489  |
|                             | SIDEAD31         | DEAD-helicase_C              | 440  |
|                             | SIDEAD32         | DEAD-helicase_C-DBP10CT      | 786  |
|                             | SIDEAD33         | DEAD-helicase_C              | 492  |

|                |                       |                              |      |
|----------------|-----------------------|------------------------------|------|
|                | SIDEAD34              | DEAD-helicase_C              | 509  |
|                | SIDEAD35              | DEAD-helicase_C              | 644  |
|                | SIDEAD36              | DEAD-helicase_C              | 613  |
|                | SIDEAD37              | DEAD-helicase_C              | 480  |
|                | SIDEAD38              | DEAD-helicase_C              | 806  |
|                | SIDEAD39              | DEAD-helicase_C              | 637  |
|                | SIDEAD40              | DEAD-helicase_C              | 414  |
|                | SIDEAD41              | DEAD-helicase_C              | 395  |
|                | SIDEAD42              | DEAD-helicase_C              | 1148 |
| ORYZA SATIVA   | LOC_Os01g07080        | DEAD-helicase_C-DUF4217      | 648  |
|                | LOC_Os01g07740        | DEAD-helicase_C              | 760  |
|                | LOC_Os01g08930        | DEAD-helicase_C              | 626  |
|                | LOC_Os01g10050        | DEAD-helicase_C              | 495  |
|                | LOC_Os01g36860        | DEAD-helicase_C              | 793  |
|                | LOC_Os01g43120        | DEAD-helicase_C              | 595  |
|                | LOC_Os01g43130        | DEAD-helicase_C              | 537  |
|                | LOC_Os01g45190        | DEAD-helicase_C              | 405  |
|                | LOC_Os01g68320        | DEAD-helicase_C              | 667  |
|                | LOC_Os02g05330        | DEAD-helicase_C              | 415  |
|                | LOC_Os02g05660        | DEAD-helicase_C              | 628  |
|                | LOC_Os02g12840        | DUF4283-DEAD-helicase_C      | 882  |
|                | LOC_Os02g42860        | DEAD-helicase_C              | 509  |
|                | LOC_Os02g57980        | DEAD-helicase_C              | 812  |
|                | LOC_Os03g06220        | DEAD-helicase_C              | 506  |
|                | LOC_Os03g19530        | DEAD-helicase_C              | 771  |
|                | LOC_Os03g36930        | DEAD-helicase_C              | 405  |
|                | LOC_Os03g46610        | DEAD-helicase_C              | 473  |
|                | LOC_Os03g50090        | DEAD-helicase_C              | 737  |
|                | LOC_Os03g51900        | DEAD-helicase_C              | 671  |
|                | LOC_Os03g58810        | DEAD-helicase_C-DUF4217      | 591  |
|                | LOC_Os03g59050        | DEAD-helicase_C              | 638  |
|                | <b>LOC_Os03g61220</b> | DEAD-helicase_C-GUCT-Zf_CCHC | 759  |
|                | LOC_Os04g43140        | DEAD-helicase_C              | 833  |
|                | LOC_Os04g45040        | DEAD-helicase_C              | 499  |
|                | LOC_Os05g01990        | DEAD-helicase_C-DUF4217      | 592  |
|                | LOC_Os06g33520        | DEAD-helicase_C              | 924  |
|                | LOC_Os06g40020        | DEAD-helicase_C              | 479  |
|                | LOC_Os06g48210        | DEAD-helicase_C              | 620  |
|                | LOC_Os06g48750        | DEAD-helicase_C              | 415  |
|                | LOC_Os07g05050        | DEAD-helicase_C              | 603  |
|                | LOC_Os07g10250        | DEAD-helicase_C              | 639  |
| LOC_Os07g20580 | DEAD-helicase_C       | 513                          |      |

|                              |                       |                              |      |
|------------------------------|-----------------------|------------------------------|------|
|                              | LOC_Os07g33340        | DEAD-helicase_C-DUF4217      | 773  |
|                              | LOC_Os07g43980        | DEAD-helicase_C              | 502  |
|                              | LOC_Os07g46580        | DEAD-DEAD-helicase_C         | 445  |
|                              | LOC_Os08g05810        | DEAD-helicase_C              | 948  |
|                              | LOC_Os08g06344        | DEAD-helicase_C              | 1050 |
|                              | LOC_Os08g32090        | DEAD-helicase_C-DBP10CT      | 852  |
|                              | LOC_Os09g21520        | DEAD-helicase_C              | 404  |
|                              | <b>LOC_Os09g34910</b> | DEAD-helicase_C-GUCT         | 697  |
|                              | LOC_Os10g35990        | DEAD-helicase_C              | 471  |
|                              | LOC_Os11g38670        | DEAD-helicase_C              | 624  |
|                              | LOC_Os11g46240        | DEAD-helicase_C              | 1399 |
|                              | LOC_Os12g29660        | DEAD-helicase_C              | 803  |
|                              | LOC_Os12g41715        | DEAD-helicase_C              | 629  |
| <b>PHYSCOMITRELLA PATENS</b> | <b>Pp3c10_20840</b>   | DEAD-helicase_C-GUCT         | 696  |
|                              | Pp3c11_17170          | DEAD-helicase_C              | 471  |
|                              | Pp3c11_22980          | DEAD-helicase_C              | 414  |
|                              | Pp3c1_12370           | DEAD-helicase_C              | 583  |
|                              | Pp3c11_24910          | WW-DEAD-helicase_C           | 733  |
|                              | Pp3c11_500            | DEAD-helicase_C-DUF4217      | 631  |
|                              | Pp3c1_21470           | DEAD-helicase_C              | 938  |
|                              | Pp3c1_22540           | DEAD-helicase_C-DUF4217      | 619  |
|                              | Pp3c1_24600           | DEAD-helicase_C              | 615  |
|                              | Pp3c1_24700           | DEAD-helicase_C              | 540  |
|                              | Pp3c1_37280           | DEAD-helicase_C              | 453  |
|                              | Pp3c13_7380           | DEAD-helicase_C              | 603  |
|                              | <b>Pp3c1_40060</b>    | DEAD-helicase_C-GUCT-Zf_CCHC | 746  |
|                              | Pp3c1_40410           | DEAD-helicase_C              | 635  |
|                              | Pp3c14_17810          | DEAD-helicase_C              | 636  |
|                              | Pp3c14_6810           | DEAD-helicase_C-DBP10CT      | 823  |
|                              | Pp3c16_16520          | DEAD-helicase_C              | 483  |
|                              | Pp3c17_13450          | DEAD-helicase_C-DUF4217      | 626  |
|                              | Pp3c17_17420          | DEAD-helicase_C              | 617  |
|                              | Pp3c17_22010          | DEAD-helicase_C              | 1050 |
|                              | <b>Pp3c20_20710</b>   | DEAD-helicase_C-GUCT         | 693  |
|                              | Pp3c21_10710          | DEAD-helicase_C              | 754  |
|                              | Pp3c2_13290           | DEAD-helicase_C              | 589  |
|                              | Pp3c21_4750           | DEAD-helicase_C              | 550  |
|                              | Pp3c2_16950           | DEAD-helicase_C              | 933  |
|                              | Pp3c2_17270           | DEAD-helicase_C-DUF4217      | 640  |
|                              | Pp3c2_1920            | DEAD-helicase_C              | 637  |
|                              | Pp3c2_24110           | DEAD-helicase_C              | 489  |
|                              | Pp3c2_25070           | DEAD-helicase_C              | 583  |

|                              |                              |                              |      |
|------------------------------|------------------------------|------------------------------|------|
| <b>MARCHANTIA POLYMORPHA</b> | Pp3c2_25130                  | DEAD-helicase_C              | 583  |
|                              | <b>Pp3c2_2520</b>            | DEAD-helicase_C-GUCT-Zf_CCHC | 831  |
|                              | Pp3c22_7840                  | DEAD-helicase_C              | 599  |
|                              | <b>Pp3c2_2840</b>            | DEAD-helicase_C-GUCT-Zf_CCHC | 744  |
|                              | Pp3c2_34920                  | DEAD-helicase_C              | 917  |
|                              | Pp3c25_520                   | DEAD-helicase_C              | 617  |
|                              | Pp3c27_1430                  | DEAD-helicase_C              | 593  |
|                              | <b>Pp3c27_1440</b>           | DEAD-helicase_C-GUCT-Zf_CCHC | 742  |
|                              | Pp3c4_14810                  | DEAD-helicase_C-DUF4217      | 865  |
|                              | Pp3c5_17030                  | DEAD-helicase_C              | 1048 |
|                              | Pp3c5_28210                  | DEAD-helicase_C              | 414  |
|                              | Pp3c6_1080                   | DEAD-helicase_C              | 414  |
|                              | Pp3c6_15830                  | DEAD-helicase_C              | 897  |
|                              | Pp3c7_14910                  | DEAD-helicase_C              | 494  |
|                              | Pp3c7_3770                   | DEAD-helicase_C              | 414  |
|                              | Pp3c7_8530                   | WW-DEAD-helicase_C           | 727  |
|                              | Pp3c8_1190                   | WW-DEAD-helicase_C           | 498  |
|                              | Pp3c9_14310                  | DEAD-helicase_C              | 823  |
|                              | Mapoly0001s0280              | DEAD-helicase_C              | 502  |
|                              | Mapoly0001s0493              | DEAD-helicase_C              | 936  |
|                              | Mapoly0002s0338              | DEAD-helicase_C              | 670  |
|                              | Mapoly0003s0204              | DEAD-helicase_C              | 572  |
|                              | Mapoly0003s0297              | DEAD-helicase_C-DUF4217      | 631  |
|                              | Mapoly0006s0271              | DEAD-helicase_C              | 555  |
|                              | Mapoly0008s0193              | DEAD-helicase_C-DUF4217      | 857  |
|                              | Mapoly0009s0142              | DEAD-helicase_C              | 516  |
|                              | Mapoly0011s0206              | DEAD-helicase_C              | 975  |
|                              | Mapoly0015s0089              | DEAD-helicase_C              | 660  |
|                              | Mapoly0020s0052              | WW-DEAD-helicase_C           | 780  |
| <b>Mapoly0021s0161</b>       | DEAD-helicase_C-GUCT         | 689                          |      |
| Mapoly0027s0149              | DEAD-helicase_C-DUF4217      | 622                          |      |
| <b>Mapoly0039s0077</b>       | DEAD-helicase_C-GUCT-Zf_CCHC | 834                          |      |
| Mapoly0043s0067              | DEAD-helicase_C              | 1243                         |      |
| Mapoly0046s0081              | DEAD-helicase_C              | 628                          |      |
| Mapoly0059s0052              | DEAD-helicase_C              | 598                          |      |
| Mapoly0062s0065              | DEAD-helicase_C              | 620                          |      |
| Mapoly0075s0037              | DEAD-helicase_C              | 414                          |      |
| Mapoly0076s0020              | DEAD-helicase_C              | 872                          |      |
| Mapoly0090s0088              | DEAD-helicase_C              | 805                          |      |
| Mapoly0095s0002              | DEAD-helicase_C              | 580                          |      |
| Mapoly0116s0020              | DEAD-helicase_C              | 454                          |      |
| Mapoly0122s0011              | DEAD-helicase_C              | 585                          |      |

|                          |                             |                         |      |
|--------------------------|-----------------------------|-------------------------|------|
|                          | Mapoly0133s0003             | DEAD-helicase_C         | 909  |
|                          | Mapoly0164s0014             | DEAD-helicase_C         | 592  |
|                          | Mapoly0165s0019             | DEAD-helicase_C-DBP10CT | 795  |
|                          | Mapoly0167s0009             | DEAD-helicase_C-DUF4217 | 662  |
| <b>MESOSTIGMA VIRIDE</b> | <b>Mv15069-RA</b>           | DEAD-helicase_C-GUCT    | 657  |
|                          | <b>Mv05255-RA</b>           | DEAD-helicase_C-GUCT    | 845  |
|                          | Mv14253-RA                  | DEAD-helicase_C         | 524  |
|                          | Mv11439-RA                  | DEAD-helicase_C         | 565  |
|                          | Mv05974-RA                  | DEAD-helicase_C         | 496  |
|                          | Mv10354-RA                  | DEAD-helicase_C         | 650  |
|                          | Mv14910-RA                  | DEAD-helicase_C         | 478  |
|                          | Mv19187-RA                  | DEAD-helicase_C         | 689  |
|                          | Mv17563-RA                  | DEAD-helicase_C         | 1036 |
|                          | Mv09192-RA                  | DEAD-helicase_C         | 440  |
|                          | Mv09769-RA                  | DEAD-helicase_C         | 719  |
|                          | Mv11662-RA                  | DEAD-helicase_C         | 487  |
|                          | Mv06156-RA                  | DEAD-helicase_C         | 769  |
|                          | Mv14240-RA                  | DEAD-helicase_C-DUF4217 | 588  |
|                          | Mv04709-RA                  | DEAD-helicase_C         | 401  |
|                          | Mv22670-RA                  | DEAD-helicase_C-DUF4217 | 623  |
|                          | Mv15167-RA                  | DEAD-helicase_C         | 985  |
|                          | Mv19190-RA                  | DEAD-helicase_C-DUF4217 | 980  |
|                          | Mv12277-RA                  | DEAD-helicase_C         | 737  |
|                          | Mv06837-RA                  | DEAD-helicase_C         | 363  |
|                          | Mv05536-RA ★                | DEAD                    | 469  |
|                          | Mv01782-RA                  | DEAD-helicase_C         | 562  |
|                          | Mv12289-RA                  | DEAD-helicase_C         | 706  |
|                          | Mv06634-RA                  | DEAD-helicase_C         | 1039 |
|                          | Mv22148-RA ★                | DEAD/SPRY-helicase_C    | 742  |
|                          | Mv18390-RA                  | DEAD-helicase_C         | 611  |
|                          | Mv21769-RA                  | DEAD-helicase_C         | 586  |
|                          | Mv06028-RA                  | DEAD-helicase_C         | 689  |
|                          | Mv03699-RA                  | DEAD-helicase_C         | 302  |
|                          | Mv17227-RA                  | DEAD-helicase_C         | 526  |
|                          | Mv08303-RA                  | DEAD-helicase_C         | 863  |
|                          | Mv17533-RA ★                | DEAD-helicase_C         | 880  |
|                          | Mv15810-RA ★                | DEAD-helicase_C-DUF4217 | 1171 |
| Mv12435-RA ★             | DEAD-helicase_C-Dicer_Dimer | 3291                    |      |
| Mv11178-RA               | DEAD-helicase_C             | 614                     |      |

|                                  |                                |                             |      |
|----------------------------------|--------------------------------|-----------------------------|------|
| <b>CHLAMYDOMONAS REINHARDTII</b> | Cre01.g021600                  | WW-DEAD-helicase_C          | 624  |
|                                  | Cre01.g022350 ★                | DEAD-helicase_C             | 1460 |
|                                  | Cre01.g028200                  | DEAD-helicase_C-helicase_C  | 751  |
|                                  | Cre01.g033832                  | DEAD-helicase_C             | 616  |
|                                  | Cre02.g090500                  | DEAD-helicase_C             | 1257 |
|                                  | Cre02.g141000 ★                | DEAD-helicase_C-Dicer_Dimer | 2237 |
|                                  | Cre03.g156150                  | DEAD-helicase_C-DUF4217     | 911  |
|                                  | Cre03.g158750                  | DEAD-helicase_C             | 571  |
|                                  | Cre03.g166650                  | DEAD-helicase_C             | 666  |
|                                  | Cre03.g188550                  | DEAD-helicase_C-DUF4217     | 914  |
|                                  | Cre03.g188750 ★                | DEAD/SPRY-helicase_C        | 776  |
|                                  | Cre03.g199647                  | DEAD-helicase_C             | 400  |
|                                  | Cre03.g200095                  | DEAD-helicase_C             | 935  |
|                                  | Cre04.g223850                  | DEAD-helicase_C             | 406  |
|                                  | Cre05.g238900                  | DEAD-helicase_C             | 771  |
|                                  | Cre06.g282600                  | DEAD-helicase_C-DUF4217     | 737  |
|                                  | Cre06.g291150                  | DEAD-helicase_C             | 819  |
|                                  | Cre06.g298650                  | DEAD-helicase_C             | 465  |
|                                  | Cre06.g306850                  | DEAD-helicase_C             | 505  |
|                                  | Cre07.g314900                  | DEAD-helicase_C-DUF4217     | 732  |
|                                  | Cre07.g334200                  | DEAD-helicase_C             | 645  |
|                                  | Cre07.g349300                  | DEAD-helicase_C             | 879  |
|                                  | Cre10.g420900                  | DEAD-helicase_C             | 930  |
|                                  | Cre10.g427700                  | DEAD-helicase_C             | 647  |
|                                  | Cre12.g505200                  | DEAD-helicase_C             | 447  |
|                                  | Cre12.g522850                  | DEAD-helicase_C             | 1037 |
|                                  | Cre12.g526850                  | DEAD-helicase_C             | 714  |
|                                  | Cre12.g539100                  | DEAD-helicase_C             | 624  |
|                                  | Cre12.g540200                  | DEAD-helicase_C             | 1118 |
|                                  | Cre13.g592150                  | DEAD-helicase_C             | 908  |
|                                  | Cre16.g661900                  | DEAD-helicase_C             | 1448 |
|                                  | Cre16.g662000                  | DEAD-helicase_C             | 653  |
|                                  | Cre16.g676400                  | DEAD-helicase_C             | 1426 |
|                                  | Cre16.g683500                  | DEAD-helicase_C             | 547  |
| <b>Cre17.g727700</b>             | DEAD-helicase_C-GUCT           | 827                         |      |
| Cre17.g744147                    | PWI-DEAD-helicase_C-Sec63-DEAD | 2169                        |      |

Sequences marked with a star (★) were omitted from the phylogenetic analysis. GUCT containing sequences are shown in bold. aa: amino acids.



### Supplementary Table S3

Oligonucleotide primers and their sequences used in the present study.

| Purpose                       | Primer name      | Sequence (5' to 3')                       |
|-------------------------------|------------------|-------------------------------------------|
| Cloning                       | SP 5' ARH1       | TTCGAACGTACGTCTGAATCCACCCATCTTAACCATCATG  |
|                               | ASP 5' ARH1      | AGTTATCTCGAGTCGCTTTGATGACGAAGAAACCTCC     |
|                               | SP 3' ARH1       | ACGAAGTTATACTAGCTCAAAAAGTGAAGACACCAAATATG |
|                               | ASP 3' ARH1      | GCGTGGCGCCACTAGAGGTGCTTTGTCTTATGGAAATTC   |
|                               | SP 5' ARH2       | TTCGAACGTACGTCTGTTGTGAAAGCATGGAGTGTAATG   |
|                               | ASP 5' ARH2      | AGTTATCTCGAGTCGTCTCACCGAAGTAAATTCTCAAGAC  |
|                               | SP 3' ARH2       | CGCCACGCGTGATATTGACGTCTACTTCTGTTGGCC      |
|                               | ASP 3' ARH2      | ATGTTAACATGCATGGGACCCACCCAATCACAAAATG     |
|                               | pBHRF-5In-SP     | CGACTCGAGATAACTTCGTATAATG                 |
|                               | pBHRF-5In-ASP    | CGACGTACGTTCGAACAATT                      |
|                               | pBHRF-1-SP       | CATGCATGTTAACATCGATCCATGG                 |
|                               | pBHRF-1-ASP      | ATATCACGCGTGGCGCCACTAG                    |
|                               | SP 5'-KI         | GATTGTGTGAGCTGTATGATAGTG                  |
|                               | ASP 5'-KI        | AGAGCCTCCGCCTCCACGACGACCAAACCGTC          |
|                               | SP 5'Inf-KI      | TTCGAACGTACGTCTGGATTGTGTGAGCTGTATGATAGTGG |
|                               | ASP 5'Inf-KI     | ACTTTTGCTAGCTCGccAGAGCCTCCGCCTCCACG       |
|                               | SP 3'Inf-KI      | ACGAAGTTATACTAGTTTCTTTCTTTTGACCTCCATTT    |
|                               | ASP 3'Inf-KI     | GCGTGGCGCCACTAGGAAGGTGCTTTGTCTTATGGAAA    |
|                               | nru-nhe-meGFP-fw | TCGCGAGCTAGCACAAAAGTTGTGGGATCCATG         |
|                               | xho-meGFP-rev    | CTCGAGACTTTGTATAGAAAAGTTGGGTGTTAC         |
| Genotyping                    | F-KO1 GS         | GAAAAAAGAGAAGAAGGTGG                      |
|                               | R-KO1 GS         | TGGAGTCATGTGCGGTAA                        |
|                               | F-KO1 GT         | ATATAGGAAAATACAAAATAGATCCAAGT             |
|                               | R-KO1 GT         | TGATGGTCATACAATTTTGTGTTG                  |
|                               | F-KO2 GS         | CGAAGAAGAAGAGAGCCAA                       |
|                               | R-KO2 GS         | ACCACAATATCAACACCCC                       |
|                               | F-KO2 GT         | CAGTAGAGAGTGTGCGAAA                       |
|                               | R-KO2 GT         | TTGGGACCTGAGGGGATCAT                      |
|                               | F-KI GS          | GACAGGAAGAAGGAGTACA                       |
|                               | R-KI GS          | CACCTCTTACAACCATCAC                       |
|                               | F-KI GT          | ATATGGGGTTTGTGGACGA                       |
|                               | R-KI GT          | ATTCTCACTTCCAACACC                        |
|                               | 35S-R            | TAAAGTGACAGATAGCTGGG                      |
|                               | Term-F           | AGGGTTCTTATAGGGTTTCGCTCATG                |
|                               | q-PCR            | Arh1q-F                                   |
| Arh1q-R                       |                  | AGGAGGTTCACTGAATCACCAAC                   |
| Arh2q-F                       |                  | CTCAGAACTCGCAGGAGCTC                      |
| Arh2q-R                       |                  | GAGGCTCACACTGAATCACCAGT                   |
| RSBq-F                        |                  | GTCGACGAGCAGTGAAGAA                       |
| RSBq-R                        |                  | ACTTCTGGAACCGAGAACGG                      |
| Southern hybridization probes | 5'TGSp-F         | TTCGAACGTACGTCTGTTGTGAAAGCATGGAGTGTAATG   |
|                               | 5'TGSp-R         | AGTTATCTCGAGTCGTCTCACCGAAGTAAATTCTCAAGAC  |
|                               | 3'TGSp-F         | CGCCACGCGTGATATTGACGTCTACTTCTGTTGGCC      |
|                               | 3'TGSp-R         | ATGTTAACATGCATGGGACCCACCCAATCACAAAATG     |

## Supplementary Results S1

### *Establishment of the P. patens knock-in mutant rh1-3xgfp*

In order to evaluate the cellular localization of PpRH1, we generated the *P. patens rh1-3xgfp* strain containing a green fluorescent protein (GFP) triplicate tag in C-terminal position, using homologous recombination (Supplementary Fig. S3, a). This was achieved by polyethylene glycol-mediated transformation of *P. patens* protoplasts with knock-in vector *phel\_GFP\_KI* (Supplementary Fig. S14, a). 13 stable transformants were isolated. Of these, three individual strains displayed a single copy insertion pattern by PCR. The three PCR positive lines were indistinguishable both morphologically and in term of life cycle from wild-type plants. Finally, specific investigation by confocal microscopy showed a similar fluorescence (GFP) pattern in these lines. One of these lines is presented in this study as *rh1-3xgfp*. Polymerase chain reaction (PCR) genotyping of *rh1-3xgfp* showing targeted single-copy insertion 3' to PpRH1 is provided in Supplementary Fig. S3, b.

### *Establishment of the P. patens deletion mutants Δrh1, Δrh2 and Δrh1/2*

To study the function of the PpRH1 and PpRH2 proteins, we generated the single deletion mutants *Δrh1* and *Δrh2*, respectively by homologous recombination. Polyethylene glycol-mediated transformation of *P. patens* protoplasts with knockout construct *pBHRF\_hel1\_KO* and *pBNRF\_hel2\_KO* (Supplementary Fig. S14, b,c) was conducted to generate the *Δrh1* and *Δrh2* mutants, respectively. After transformation 82 putative *Δrh1* and 90 putative *Δrh2* stable transformants were identified. These transformants were subjected to three rounds of PCR genotyping identifying 10 *Δrh1* and 7 *Δrh2* individuals harboring loss of locus and the appropriate 5' and 3' targeting events. The *Δrh1* individuals did not display any phenotype whatsoever, and one was chosen as the working strain and termed *Δrh1*. The individual *Δrh2* plants presented minimal protonemata defects, and one was chosen as the working strain and termed *Δrh2*.

To analyze the functional redundancy of the PpRH1 and PpRH2 genes, we also generated the *Δrh1/2* double knockout line by transforming *Δrh2/cre* protoplasts, a marker-free *Δrh2* line generated by cre/lox-mediated excision of the antibiotic resistant

cassette (Supplementary Fig. S5, c) with pBHRF\_hel1\_KO (Supplementary Fig. S14, b), yielding 27 stable transformants of which 9 were PCR genotyping positive (loss of locus and appropriate 5' and 3' targeting). These 9 lines displayed a clear protonemal growth reduction. One of the strains was chosen as the working strain and termed  $\Delta rh1/2$ . Supplementary Fig. S5, d presents the PCR genotyping results of  $\Delta rh1$ ,  $\Delta rh2$  and  $\Delta rh1/2$ , confirming deletion of *PpRH1* and *PpRH2* in the corresponding single and double mutant lines in addition to the appropriate 5' and 3' targeting events. Southern Blot hybridization confirmed the  $\Delta rh2/cre$  mutant (Supplementary Fig. S5, e). Quantitative reverse transcription PCR (RT-qPCR) (Fig. 2b) and RT-PCR (Supplementary Fig. S5, f) revealed no detectable levels of *PpRH1* and *PpRH2* transcripts in the corresponding knockout mutants confirming the targeted removal of the genes.

#### *Gametophyte growth under stress conditions*

Low light conditions ( $5 \mu\text{mol.m}^{-2}.\text{s}^{-1}$ ) caused significant reduction of protonemata spreading with calculated plant area around  $15 \text{ mm}^2$  in WT and  $\Delta rh1$  (Supplementary Fig. S7, a) compared to  $65 \text{ mm}^2$  under standard conditions. Slowly growing protonemata were predominantly composed of chloronema cells. Side branch growth was increased in  $\Delta rh2$  to the point that they overgrew slowly expanding primary filaments (Supplementary Fig. S7, b,c).

High light conditions ( $140 \mu\text{mol.m}^{-2}.\text{s}^{-1}$ ) affected primary filaments extension, regularity of side-branching and stimulated gametophore growth. Nevertheless, enhanced elongation of side branches in  $\Delta rh2$  and their strong reduction in  $\Delta rh1/2$  compared to WT and  $\Delta rh1$  remained consistent (Supplementary Fig. S8).

Salt stress reduced gametophore formation but on the other hand stimulated protonemata growth. Inoculated plants appeared bushier compared to standard conditions, with actively branching secondary filaments. Again, side branch extension was visibly increased in  $\Delta rh2$  and strongly reduced in  $\Delta rh1/2$  when compared to WT and  $\Delta rh1$  (Supplementary Fig. S9 b,c).

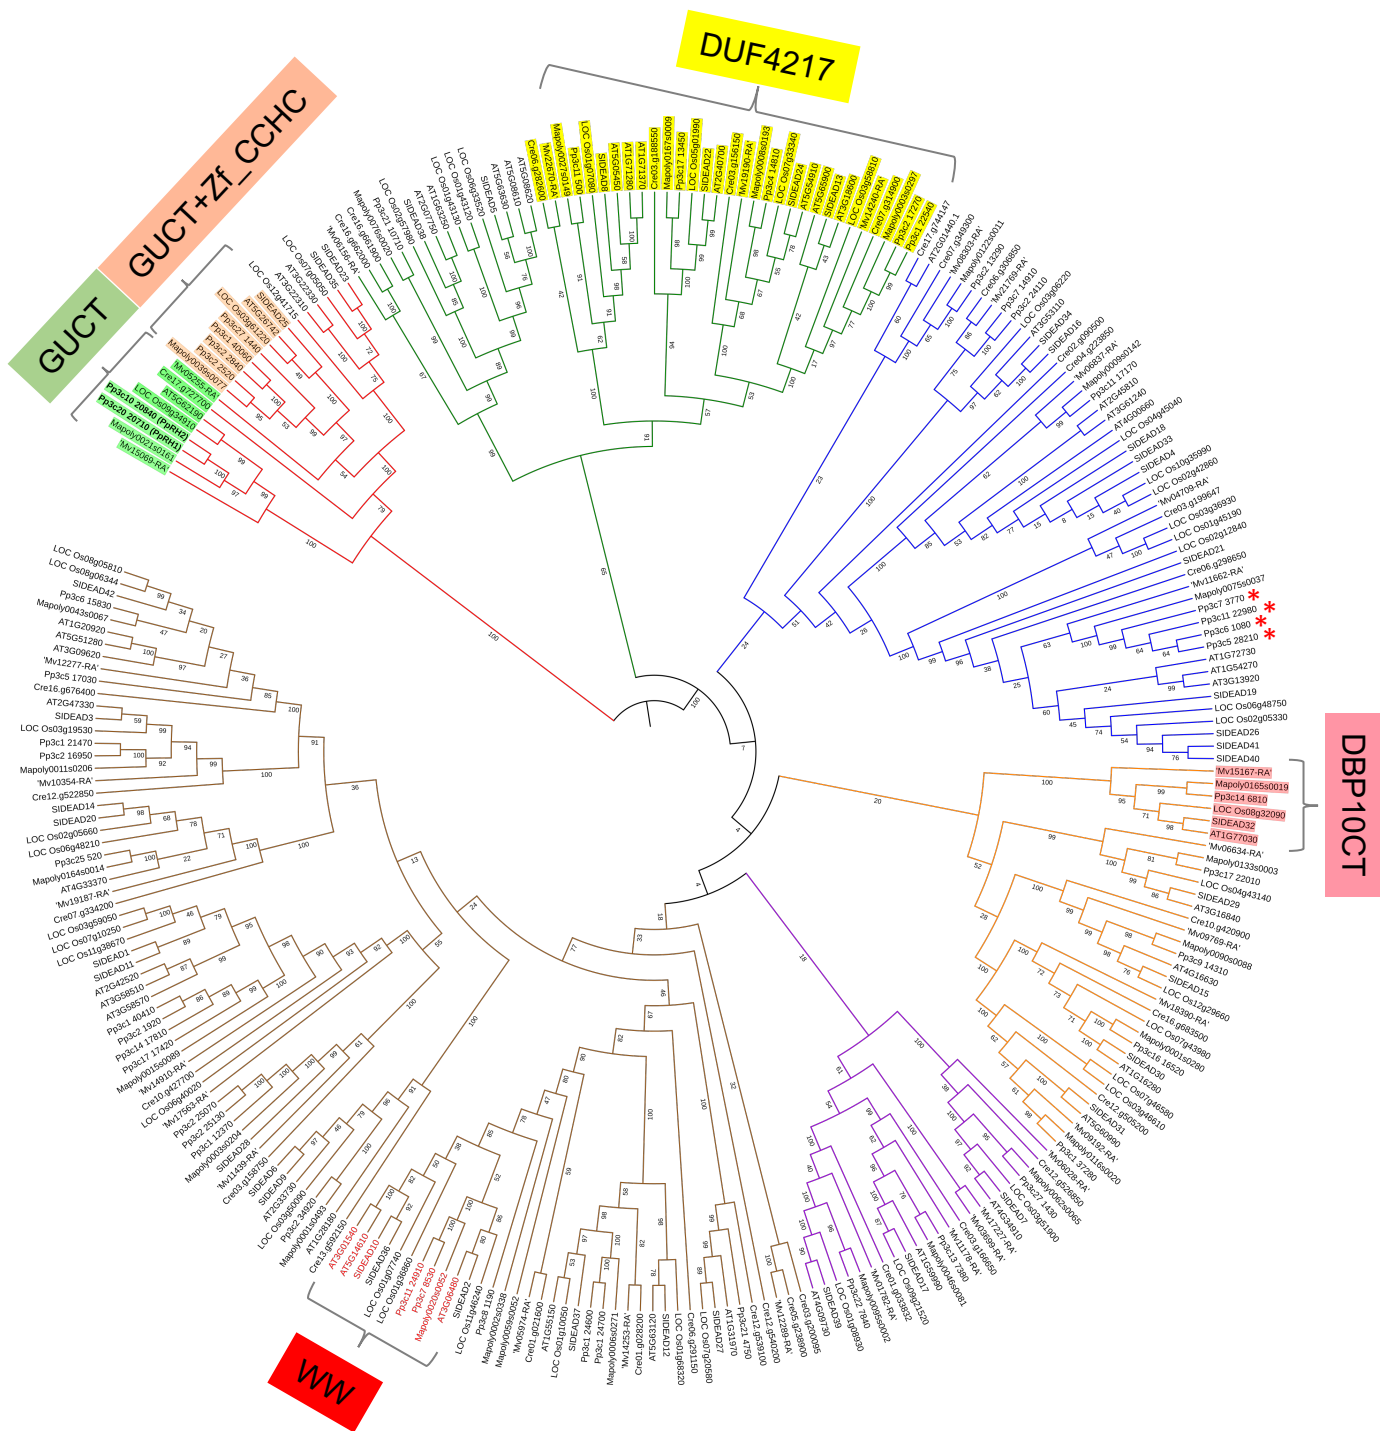

**Fig S1 Phylogenetic analysis of the core domain of DEAD-box RNA helicases in *Arabidopsis thaliana*, *Oryza sativa*, *Solanum lycopersicum*, *Physcomitrium patens*, *Marchantia polymorpha*, *Mesostigma viride* and *Chlamydomonas reinhardtii*.** The RNA helicases cluster into six major clades (shown in different colors). Proteins containing the GUCT, GUCT-Zf-CCHC, WW, DUF4217 or DBP10CT domains each clustered separately into one individual group. The eukaryotic translation initiation factors (eIF4A) proteins in *P. patens* are shown with a red star (Tyagi et al., 2020). The sequences listed without a black star (★) in Supplementary Table S2 are included in this analysis. The sequences were aligned with MAFFT (v.7) and E-Ins-I. Phylogenetic reconstructions was performed using the neighbor-joining method in the CLC genomic workbench v. 12 with 1000 bootstrap iterations.

(A)

*PpRH1*

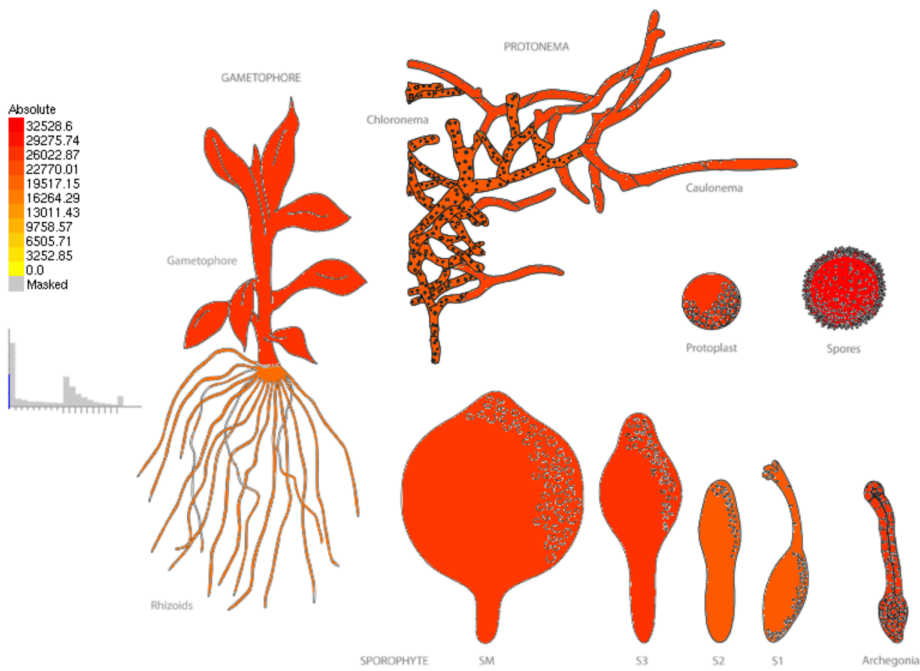

(B)

*PpRH2*

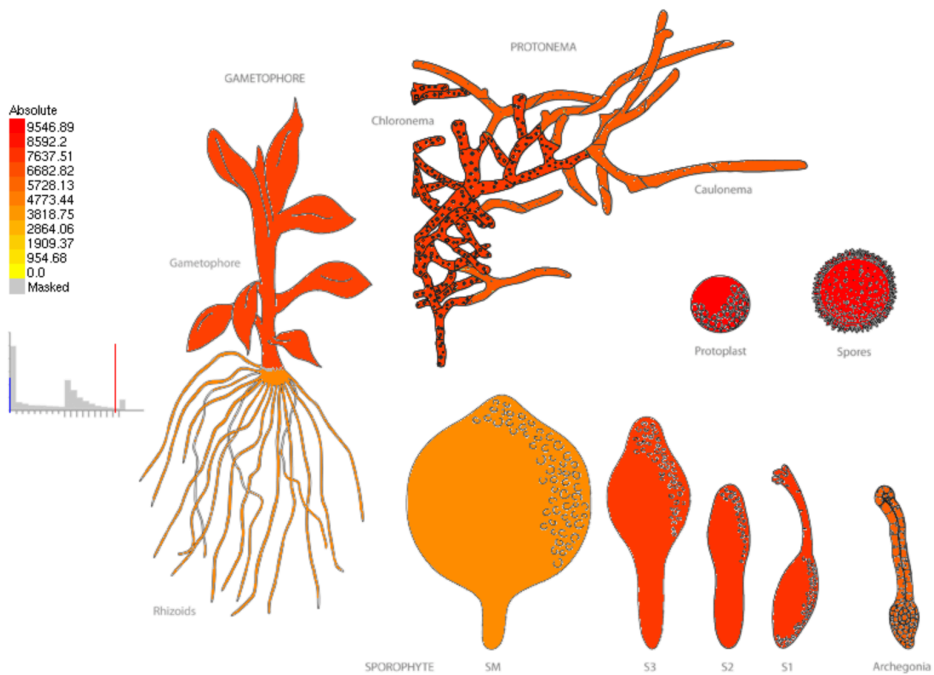

**Fig S2 *PpRH1* and *PpRH2* expression profiles in *Physcomitrium patens* tissue.** The absolute expression level of **a** *PpRH1* (Pp3c20\_20710) and **b** *PpRH2* (Pp3c10\_20840) using color codes as reported by the Physcomitrella eFP browser, showing the ubiquitous expression of both genes and the higher expression of *PpRH2* relative to *PpRH1*.

(A)

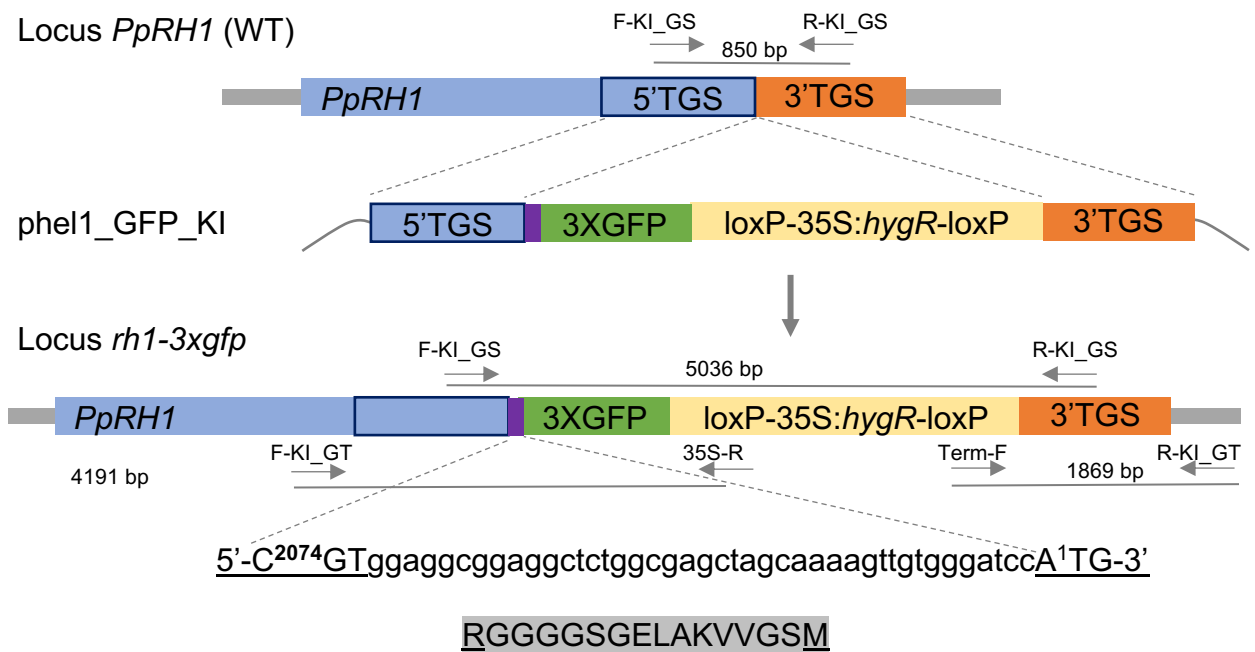

(B)

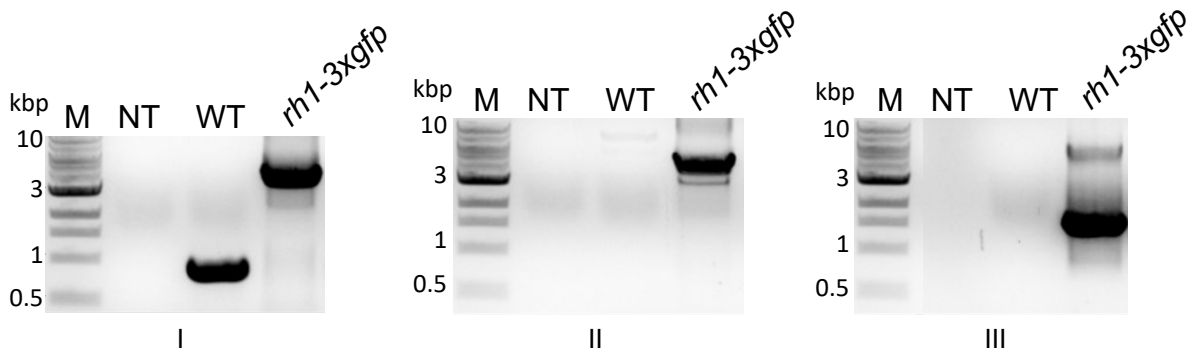

**Fig S3 Targeted insertion and PCR genotyping of the *P. patens* *rh1-3xgfp* mutant line.** **a** Schematic representation of the GFP knock-in strategy to create the *rh1-3xgfp* mutant using vector *phe1\_GFP\_KI*. The purple box between the 5'TGS and 3XGFP sequences represent the linker sequence between *PpRH1* and *GFP*, corresponding to the amino acid sequence provided in the grey box. The last (R) and first (M) amino acids in *PpRH1* and *GFP*, respectively are underlined. The corresponding nucleic acid sequence of the linker is shown above the amino acid sequence; the numbers 2074 and 1 refer to the nucleotide position in genes *PpRH1* and *GFP*, respectively. Annealing sites for primers used for PCR genotyping are shown with arrows (the sequences of the primers can be found in Supplemental Data S1). The expected PCR amplicons and their sizes are indicated with grey solid lines. **b** Gel-electrophoresis analysis showing the expected PCR product sizes for WT and *rh1-3xgfp* with primer set I (F-KI\_GS/R-KI\_GS), II (F-KI\_GT/35S-R) and III (Term-F/R-KI\_GT). M = DNA size marker; NT = non-template PCR control.



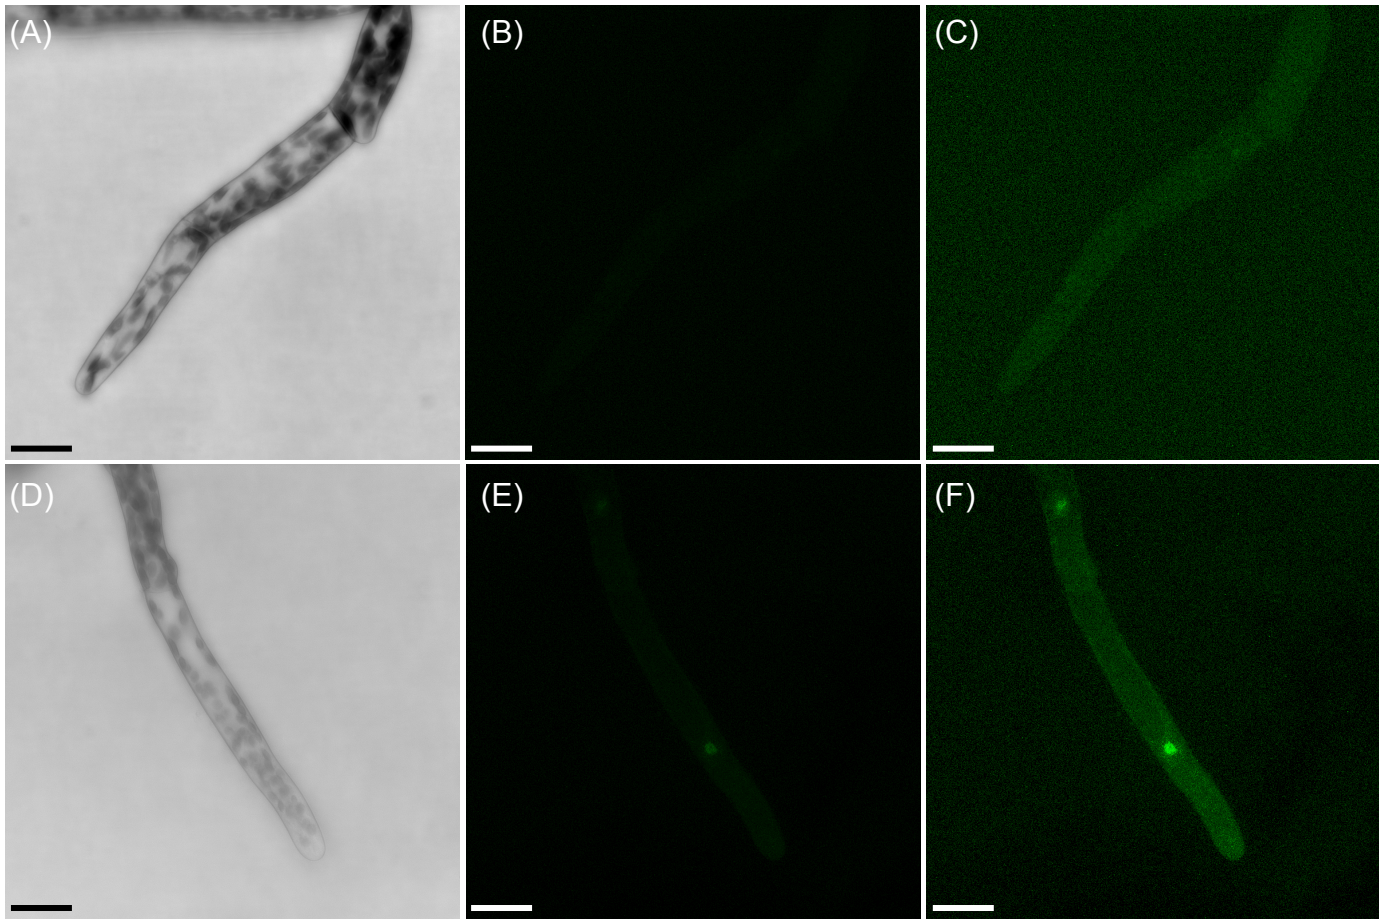

**Fig S4 Comparison of the GFP fluorescent signal between *rh1-3xgfp* and wild-type protonema.** **a-c** Tip cell of filament of wild-type *Physcomitrium patens* protonema. **d-f** Tip cell of filament of *rh1-3xgfp* protonema. **a** and **d** Average projection of confocal stack of transmitted light acquisition. **b** and **e** Maximum projection of confocal stack of PpRH1-3xGFP fluorescent signal without overexposure. **c** and **f** Maximum projection of confocal stack of PpRH1-3xGFP fluorescent signal with overexposure. PpRH1-3xGFP accumulates in nucleus, a signal absent from the wild-type strain. Bar: 25  $\mu$ m.

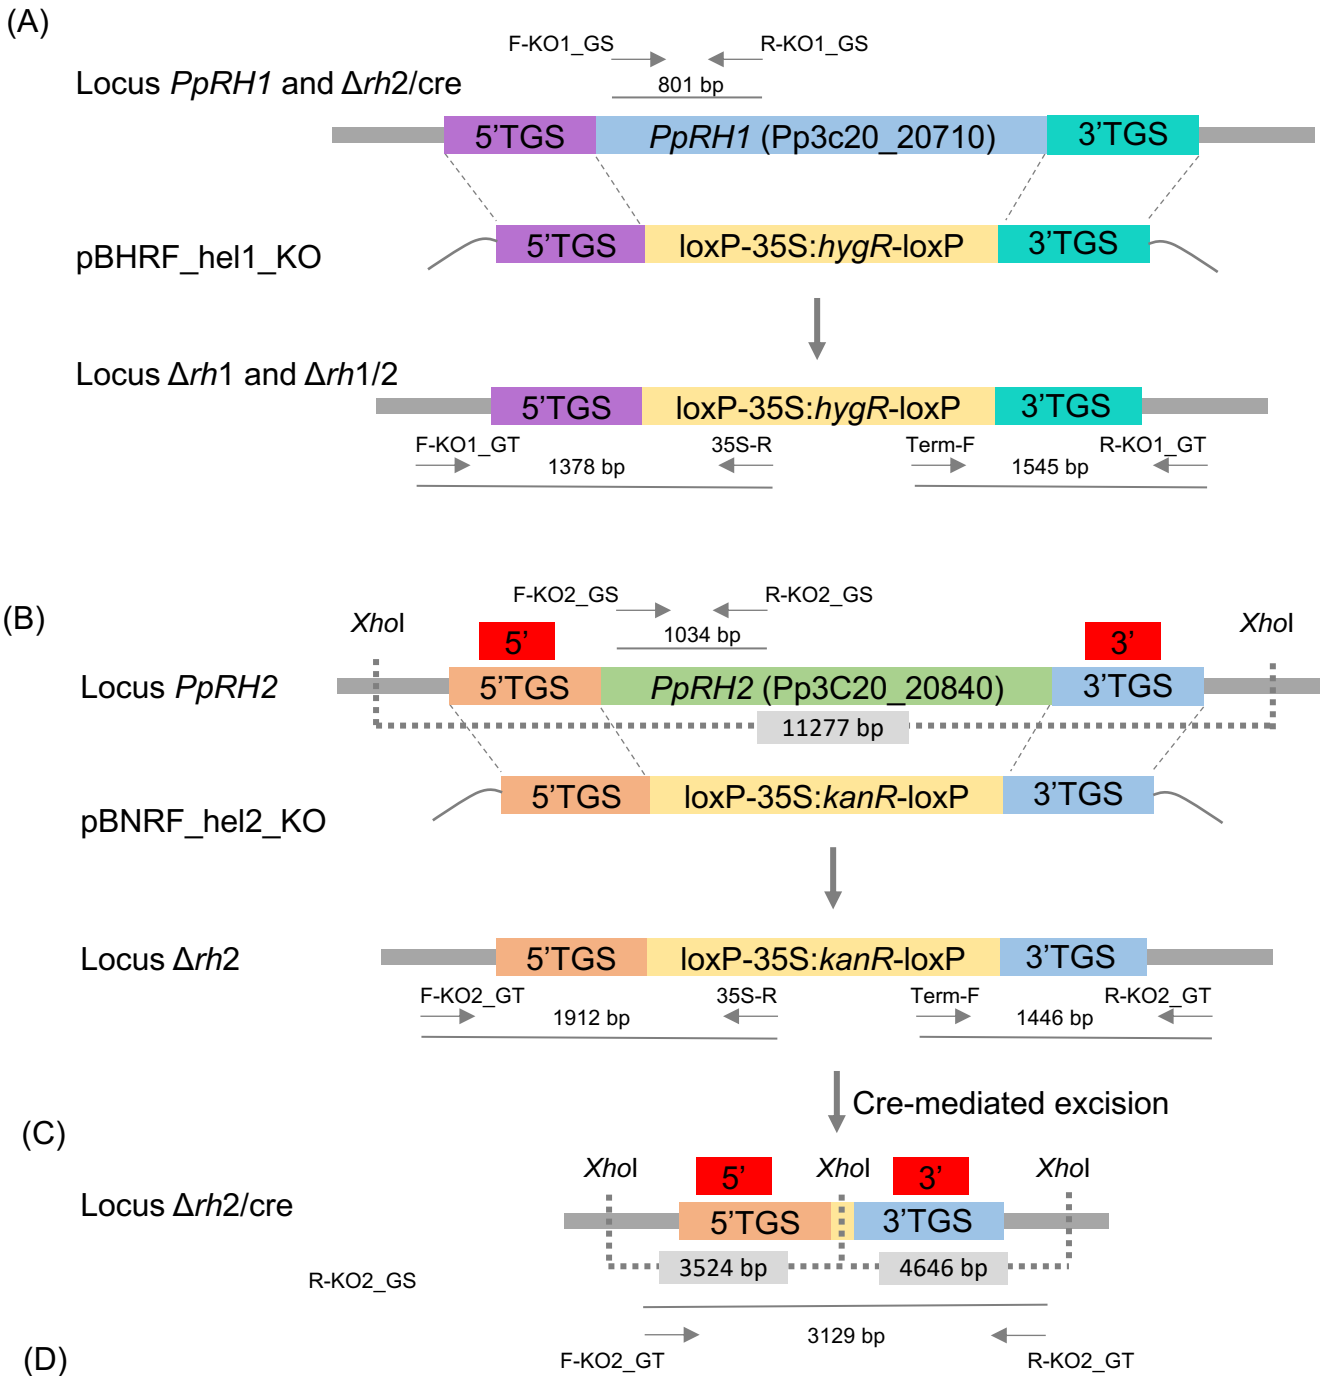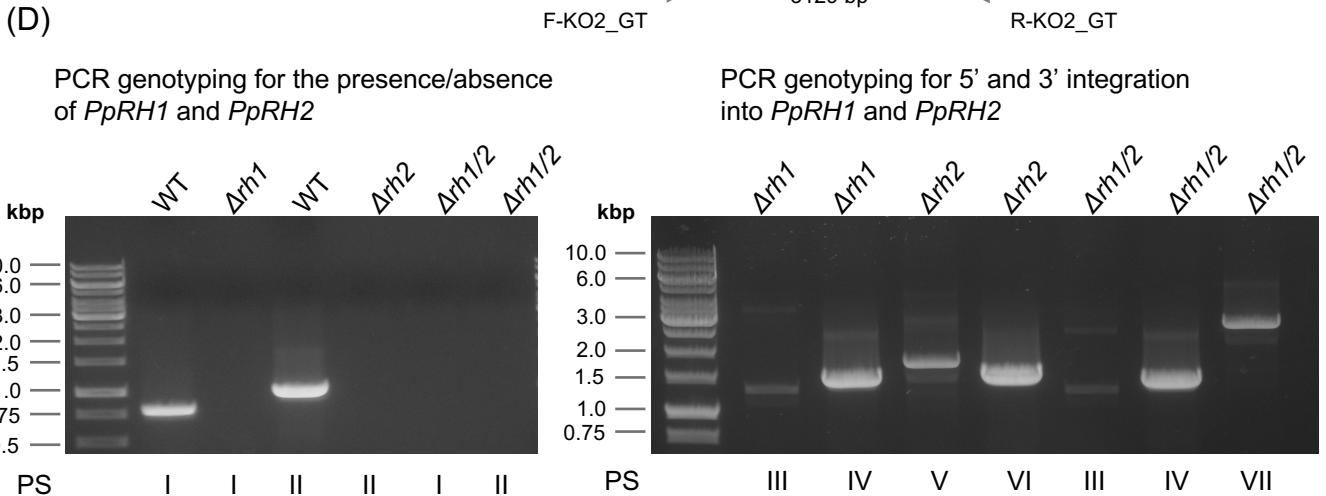



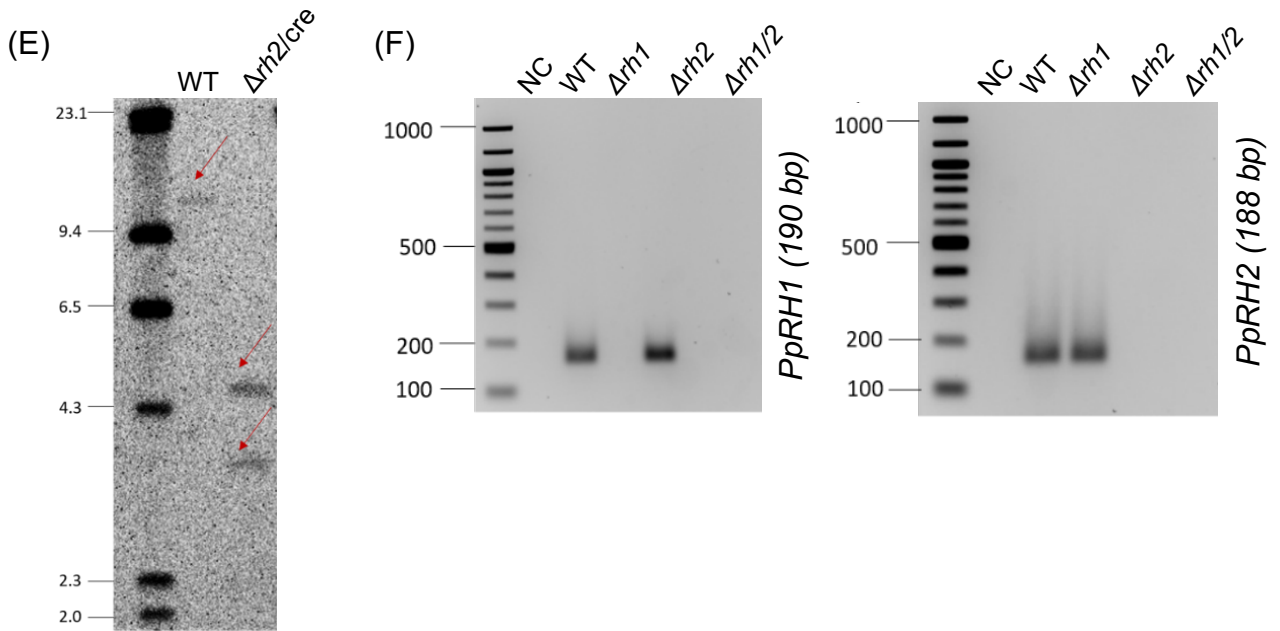

**Fig S5 Targeted insertion and molecular characterization of the *P. patens*  $\Delta rh1$ ,  $\Delta rh2$ ,  $\Delta rh1/2$  and  $\Delta rh2/cre$  mutant lines.** **a** Schematic representation of the *PpRH1* gene-targeting strategy to make the  $\Delta rh1$  and  $\Delta rh1/2$  mutants by transformation of WT and  $\Delta rh2/cre$ , respectively, using the pBHRF\_hel1\_KO plasmid vector. Annealing sites for primers used for PCR genotyping are shown with arrows and the sizes of the expected products are given above the solid grey line. **b** Schematic representation of the *PpRH2* gene-targeting strategy to make the  $\Delta rh2$  mutant by transformation of WT *P. patens* protoplasts with the pBHRF\_hel2\_KO plasmid vector, and **c** elimination of the resistant cassettes by Cre-mediated excision resulting in the establishment of the  $\Delta rh2/cre$  mutant. Annealing sites for primers used for PCR genotyping are shown with arrows and the sizes of the expected products are given above the solid grey line. The hybridization sites of the Southern blotting 5' and 3' probes are shown in red boxes. The restriction enzyme used for Southern blotting and the localization of the recognition sites are indicated. The sizes of the expected Southern Blot fragments are given in grey boxes. **d** PCR genotyping of the  $\Delta rh1$ ,  $\Delta rh2$  and  $\Delta rh1/2$  mutants. DNA was extracted from WT and mutant lines and used as templates in PCR reactions with the following primer sets (PS); I: F-KO1\_GS/R-KO1\_GS; II: F-KO2\_GS/R-KO2\_GS; III: F-KO1\_GT/35S-R; IV: Term-F/R-KO1\_GT; V: F-KO2\_GT/35S-R; VI: F-KO2\_GT/35S-R; VII: F-KO2\_GT/R-KO2\_GT. The sizes of the PCR products are in accordance with the expected sizes shown in a-c. **e** Southern blot analysis of the  $\Delta rh2/cre$  mutant. The analysis was performed to confirm single copy targeted insertion in the mutant and the elimination of the resistant cassette prior to transformation. Restriction fragments were generated using *Xho*I and a blot hybridized with a mixture of 5' and 3' TGS probes displayed the expected hybridization signals. M = marker; WT = wild type. **f** RT-PCR analysis of *PpRH1* and *PpRH2* expression in *P. patens* WT and  $\Delta rh1$ ,  $\Delta rh2$ ,  $\Delta rh1/2$  mutant plants. Amplicons of the expected sizes were detected in WT samples amplified with primers specific for both *PpRH1* and *PpRH2*, but were absent in the corresponding mutants. Primers used for amplification; for *PpRH1*: Arh1q-F/Arh1q-R; for *PpRH2*: Arh2q-F/ Arh2q-R. NC = non-template control.

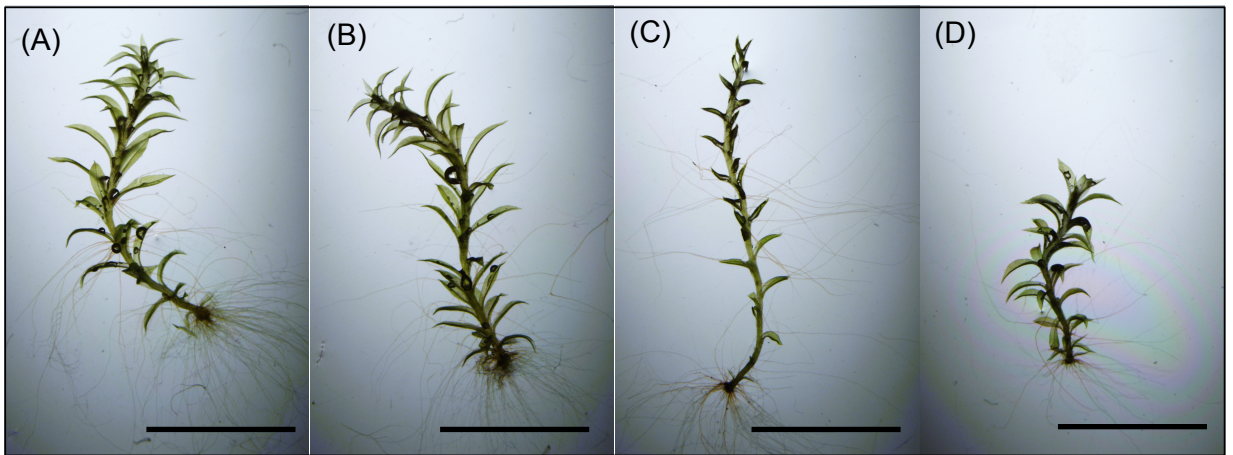

**Fig S6 Long-term effect of reduced light on WT compared to *PpRH1* and *PpRH2* deletion mutant gametophores.** Isolated gametophores from three month old cultures of WT, *PpRH1* deletion mutant ( $\Delta rh1$ ), *PpRH2* deletion mutant ( $\Delta rh2$ ) and double deletion mutant ( $\Delta rh1/2$ ). Cultures were cultivated on BCD medium under 16h light/8h dark cycle with light intensity  $10 \mu\text{mol.m}^{-2}.\text{s}^{-1}$  at  $24^\circ\text{C}$ . Scale bar: 1cm.

(A)

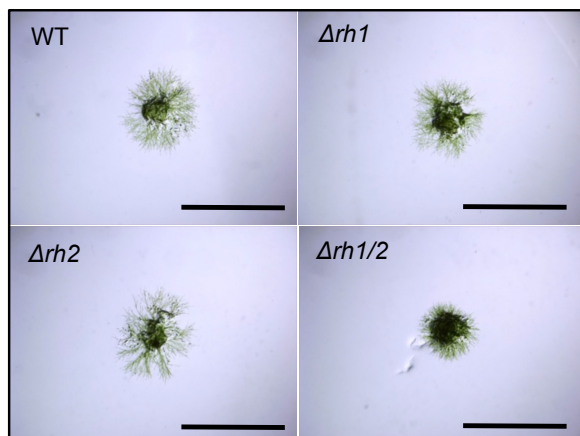

(B)

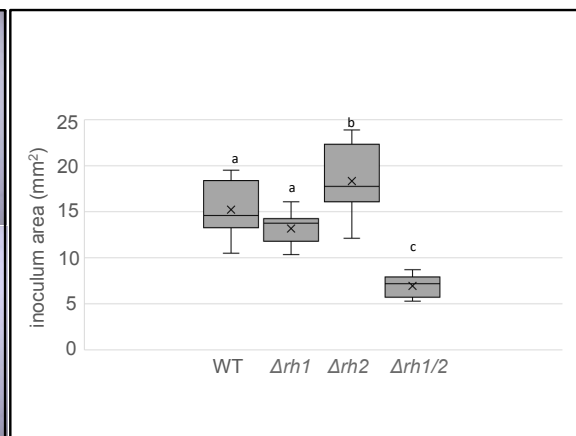

(C)

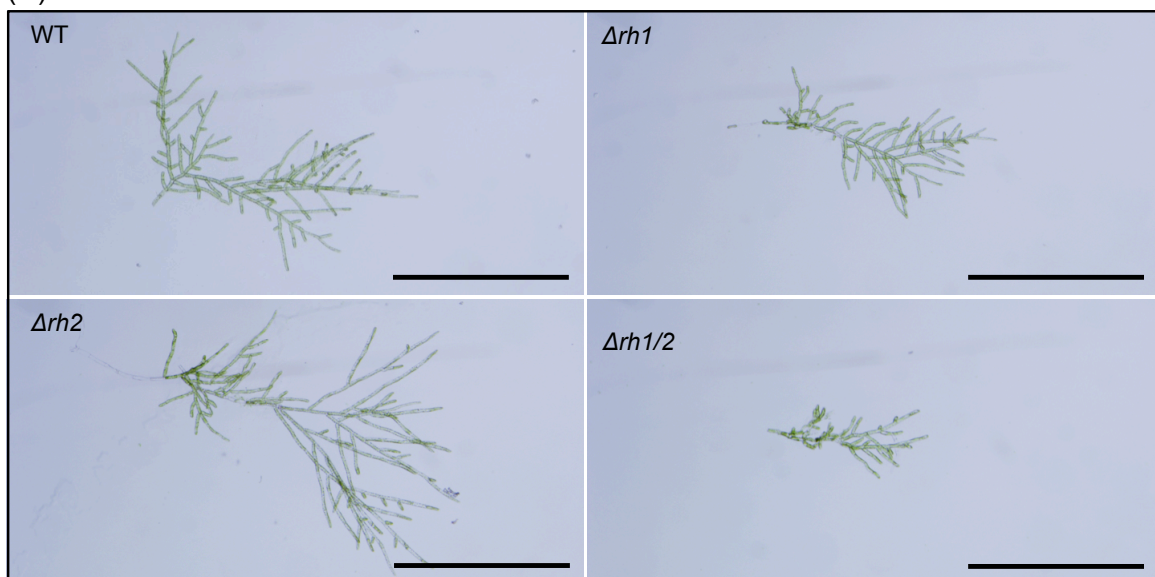

**Fig S7 Vegetative growth under low light.** **a** Two weeks old spot inocula grown on minimal BCD medium under low light ( $5 \mu\text{mol}\cdot\text{m}^{-2}\cdot\text{s}^{-1}$ , 16h light/8h dark at  $24^\circ\text{C}$ ). **b** The graph represents the area of ellipse surrounding individual inocula for each strain as measured and calculated using PROMICRA QuickPHOTO MICRO 3.0 software. Statistical significance (a, b, c) of the means was assessed at 95% confidence. Analysis of variance (ANOVA) and least significant difference (LSD) was performed in multiple sample comparison ( $n = 12$ ). **c** Detailed view on isolated filaments shows accelerated side branch growth in  $\Delta rh2$  and reduced protonemata growth in  $\Delta rh1/2$  compared to WT and  $\Delta rh1$ . Scale bars: 5,0 mm in **a**, 1,0 mm in **c**.

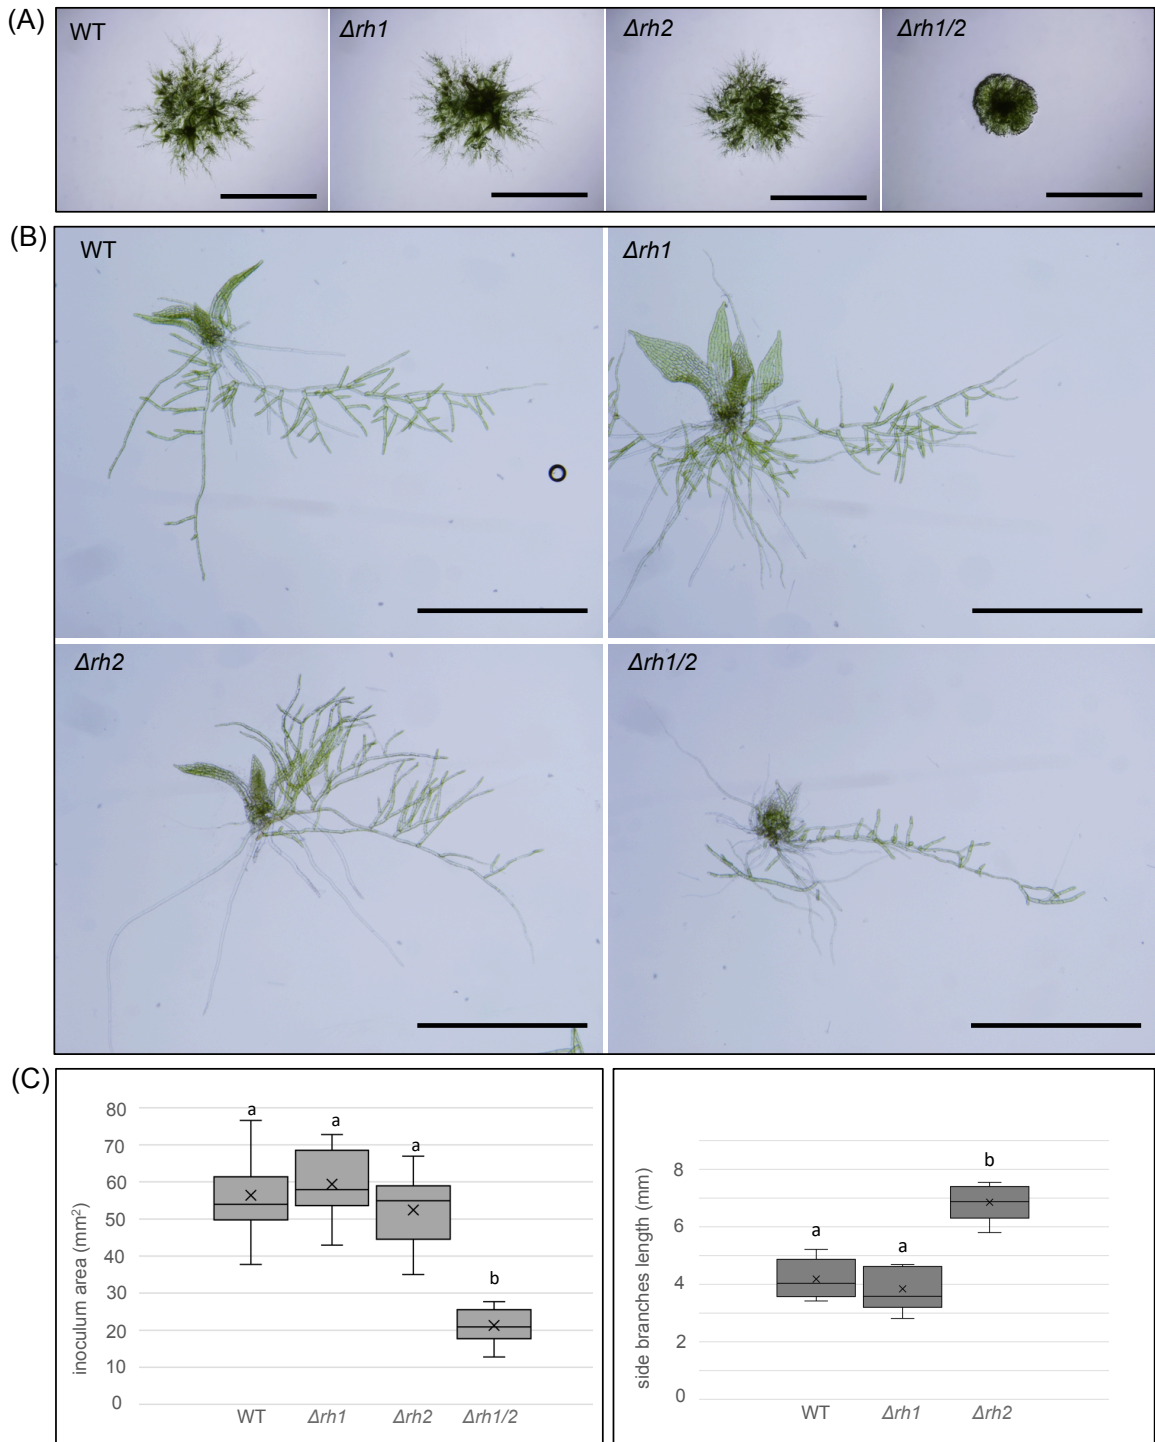

**Fig S8 Vegetative growth under high light.** **a** Two weeks old spot inocula grown on minimal BCD medium under high light ( $140 \mu\text{mol}\cdot\text{m}^{-2}\cdot\text{s}^{-1}$ , 16h light/8h dark at  $24^\circ\text{C}$ ). **b** Detailed view on isolated filaments shows accelerated protonemata side branch growth in  $\Delta rh2$  and aberrant protonemata growth in  $\Delta rh1/2$  compared to WT and  $\Delta rh1$ . **c** Left graph represents the area of ellipse surrounding individual inocula for each strain. Right graph: the length of first ten side branches (the sum) counted from the tip of the primary filament. Measurements were performed using PROMICRA QuickPHOTO MICRO 3.0 software. Statistical significance (a, b, c) of the means was assessed at 95% confidence. Analysis of variance (ANOVA) and least significant difference (LSD) was performed in multiple sample comparison ( $n = 12$ ). Scale bars: 5,0 mm in **a**, 1,0 mm in **b**.



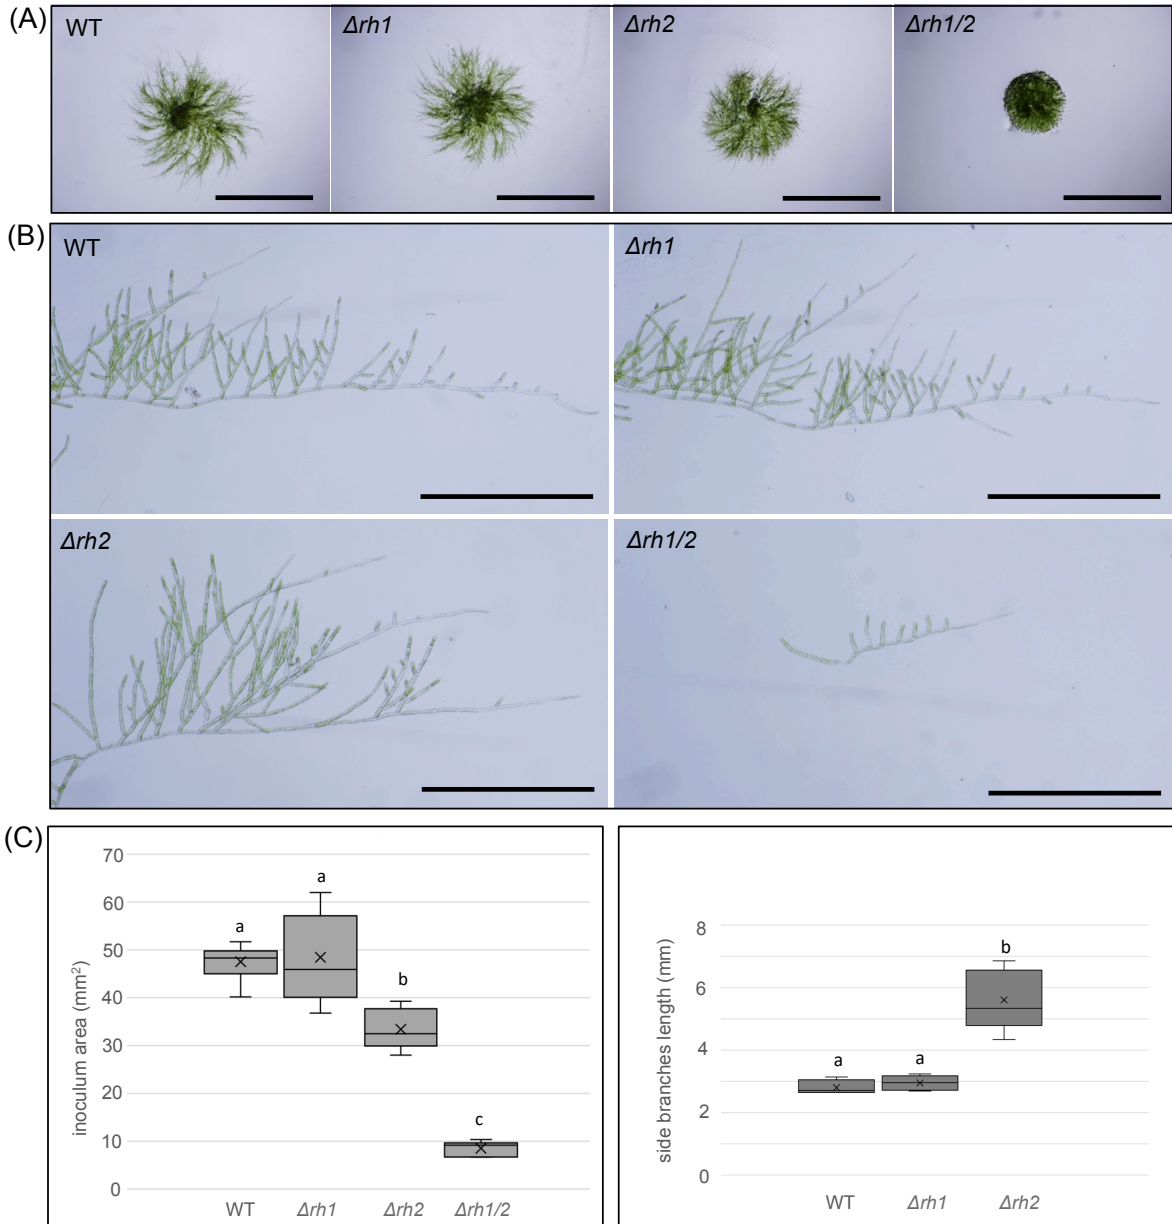

**Fig S9 Vegetative growth on 90mM NaCl containing medium.** **a** Two weeks old spot inocula grown on minimal BCD medium supplemented with 90mM NaCl. **b** Detailed view on isolated filaments shows accelerated protonemata side branch growth in  $\Delta rh2$  and aberrant protonemata growth in  $\Delta rh1/2$  compared to WT and  $\Delta rh1$ . **c** Left graph represents the area of ellipse surrounding individual inocula for each strain. Right graph: the length of first ten side branches (the sum) counted from the tip of the primary filament. Measurements were performed using PROMICRA QuickPHOTO MICRO 3.0 software. Statistical significance (a, b, c) of the means was assessed at 95% confidence. Analysis of variance (ANOVA) and least significant difference (LSD) was performed in multiple sample comparison ( $n = 12$ ). Scale bars: 5,0 mm in **a**, 1,0 mm in **b**.

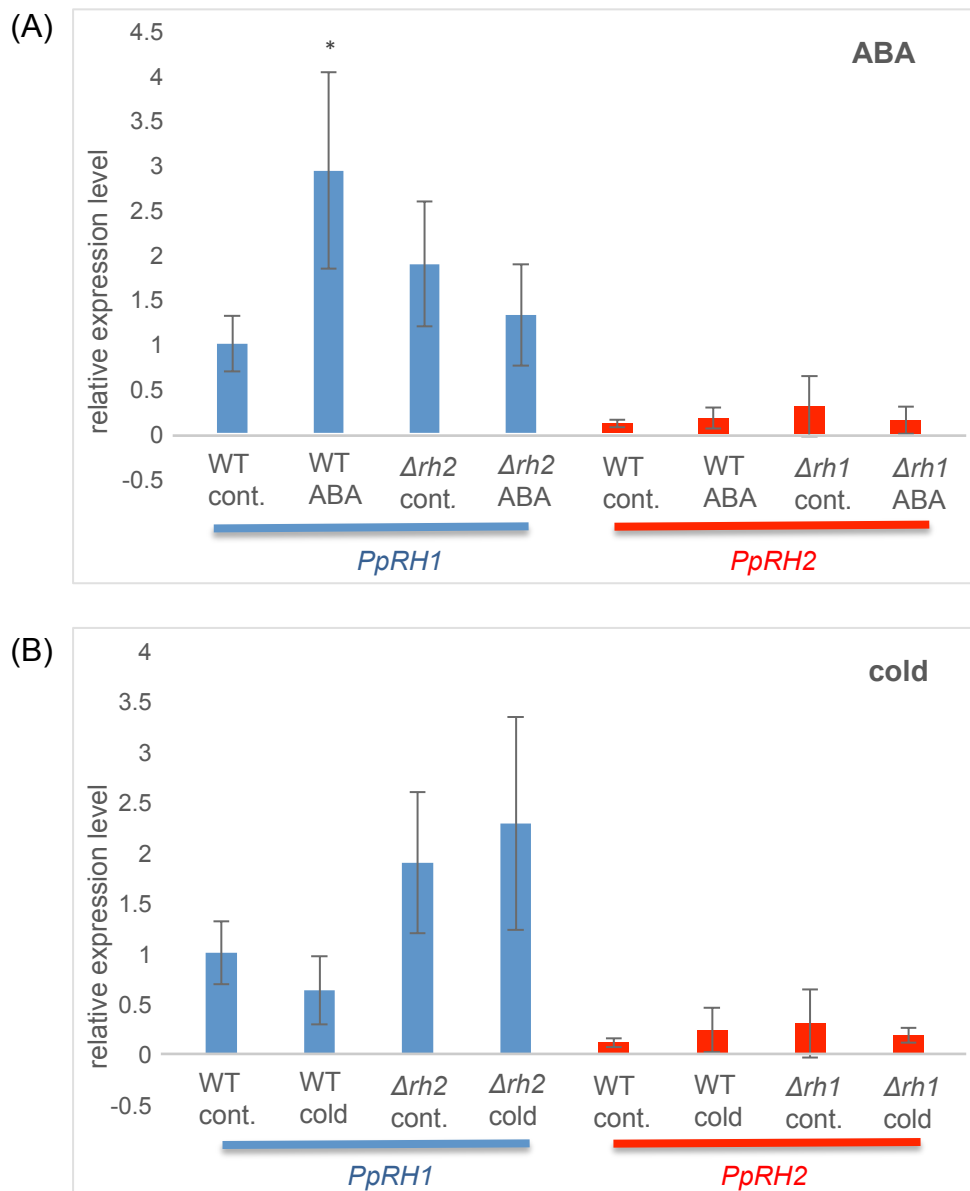

**Fig S10 Quantitative PCR analysis of *PpRH1* and *PpRH2* after ABA and cold treatment.** **A** Blue bars on the left represent *PpRH1* relative expression level in WT and  $\Delta rh2$  mutant under standard conditions (cont.) and 24h treatment on media supplemented with 10  $\mu$ M ABA. Red bars on the right represent *PpRH2* relative expression level in WT and  $\Delta rh1$  mutant under standard conditions (cont.) and 24h treatment on media supplemented with 10  $\mu$ M ABA. **B** Blue bars on the left represent *PpRH1* relative expression level in WT and  $\Delta rh2$  mutant under standard conditions (cont.) and 24h cold treatment (10°C). Red bars on the right represent *PpRH2* relative expression level in WT and  $\Delta rh1$  mutant under standard conditions (cont.) and 24h cold treatment. Statistically significant differences between WT at control conditions and treatments from three independent cultures were analysed by Student's *t* test. The statistical significance was attributed at the 0.01 probability level and is denoted as \**P* < 0.01.

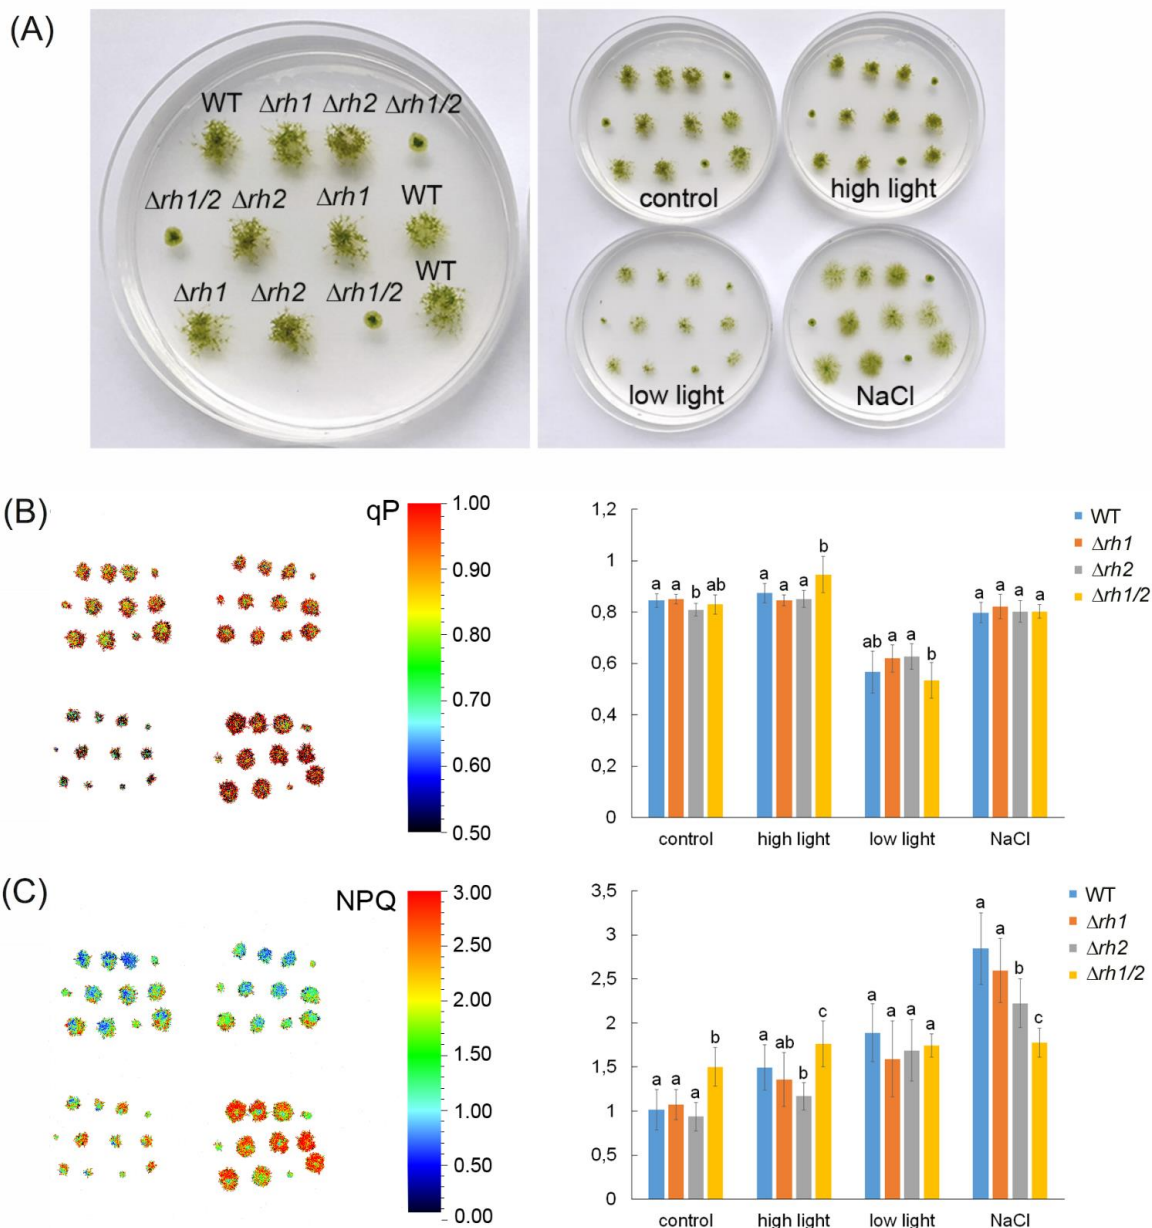

**Fig S11 Chlorophyll fluorescence imaging and quantification.** **a** Plant distribution on Petri dish (left) and Petri dishes with individual treatments. **b** Photochemical quenching (qP). **c** Non-photochemical quenching (NPQ). On the left, representative images with scales are shown. Plants and plates distribution matches images on **a**. On the right, mean values  $\pm$  S.D. ( $n = 12$ ) are shown. Different letters indicate significant differences at  $P < 0.05$  within one treatment (ANOVA, Tukey-test).

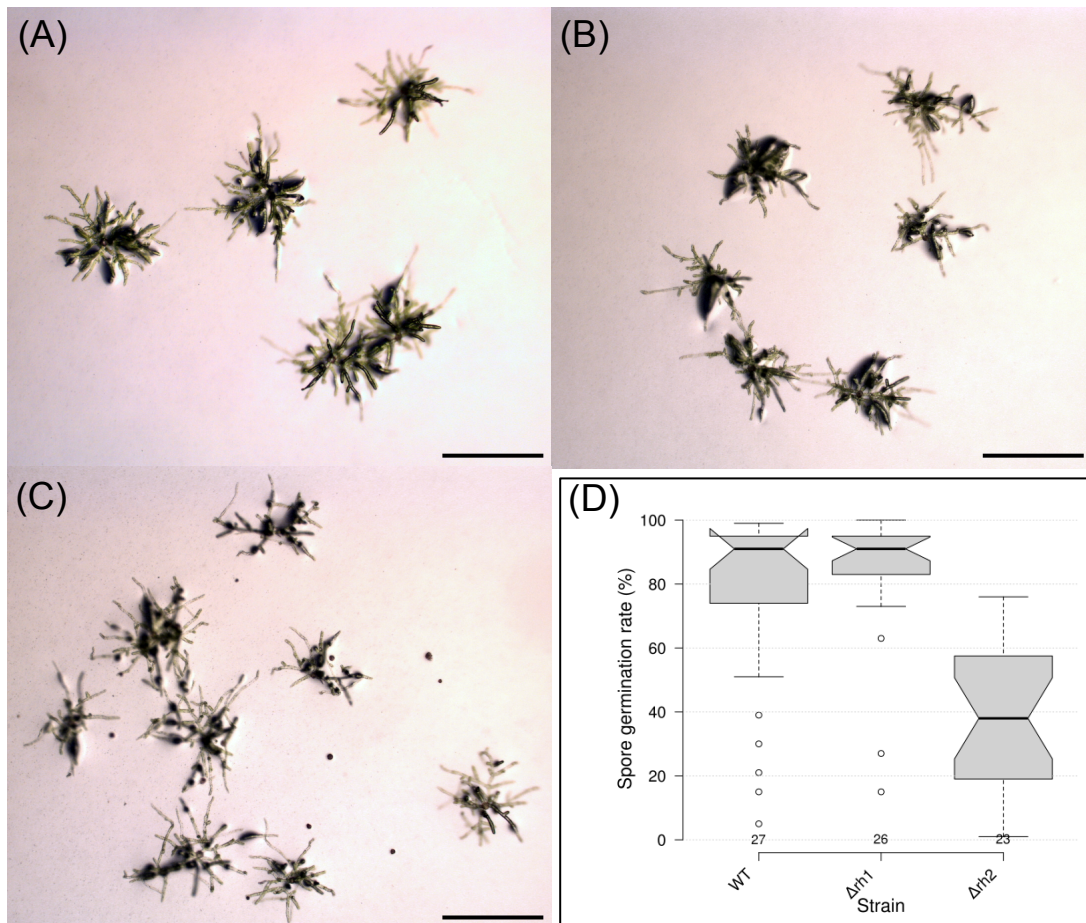

**Fig S12  $\Delta rh2$  spores display a reduced germination rate compared to WT and  $\Delta rh1$ .** Spores were set on BCDA medium and let germinate and grow unto sporelings for seven days under standard growth conditions. **a** Wild-type sporelings. **b**  $\Delta rh1$  sporelings. **c**  $\Delta rh2$  sporelings. Bar: 500  $\mu$ m. **d** Box plot displaying spore germination rates of individual sporophyte. Germination rates were assessed with a sample of 100-300 spores per sporophyte. Center lines show the medians; box limits indicate the 25th and 75th percentiles as determined by R software; whiskers extend 1.5 times the interquartile range from the 25th and 75th percentiles, outliers are represented by dots. n = 27, 26, 23 tested sporophytes. The plot was generated using the online tool BoxPlotR: a web-tool for generation of box plots (<http://shiny.chemgrid.org/boxplotr/>).



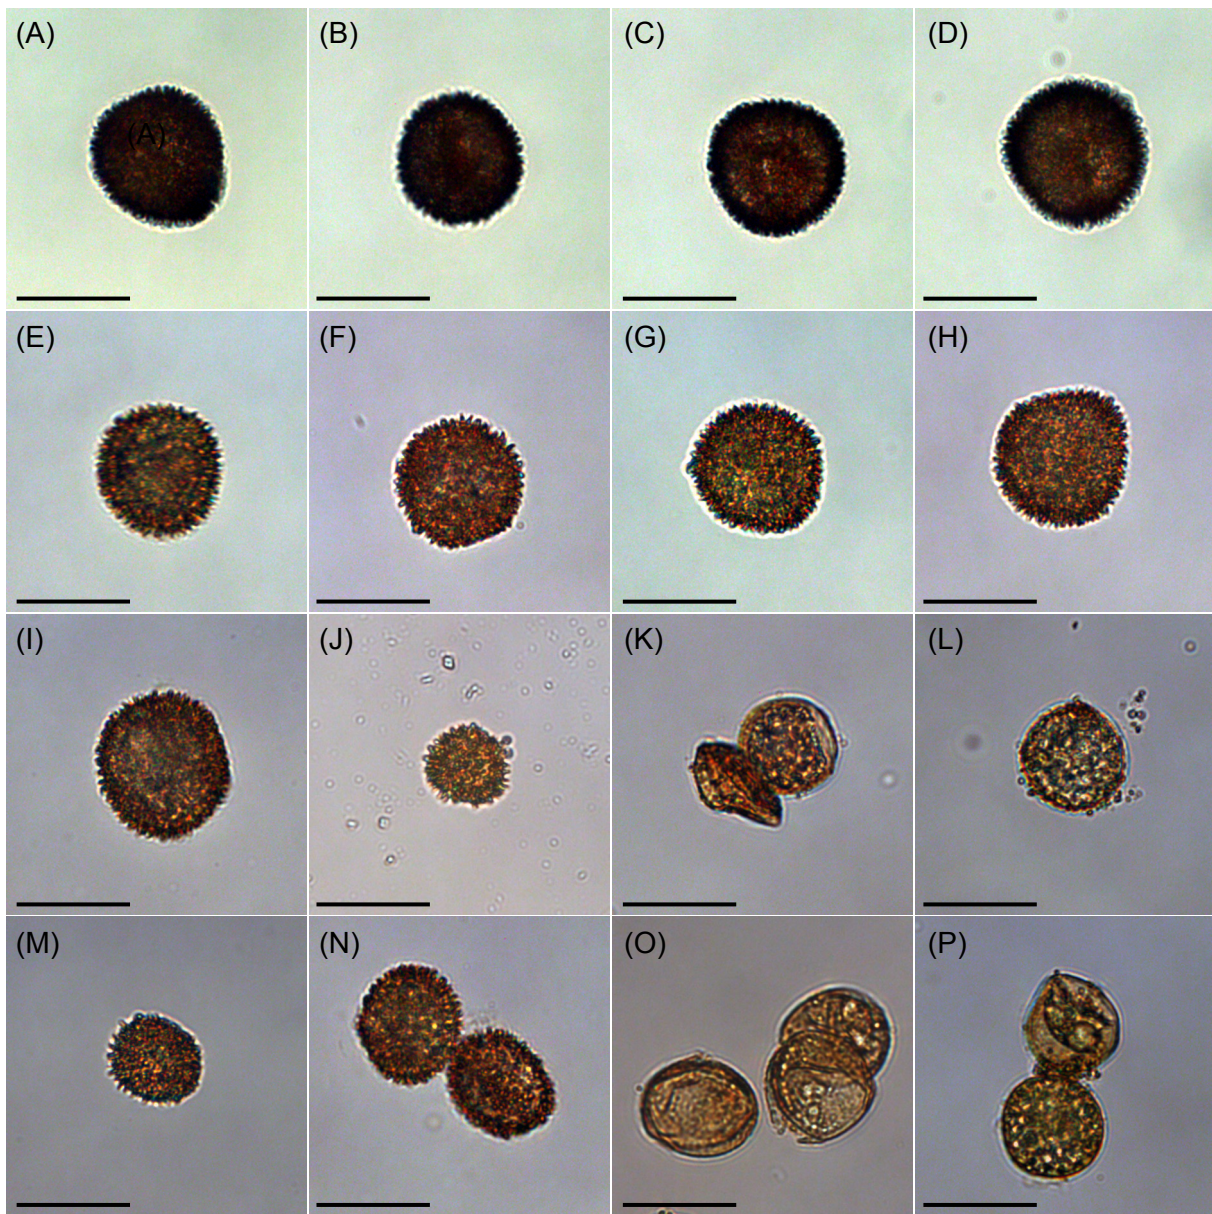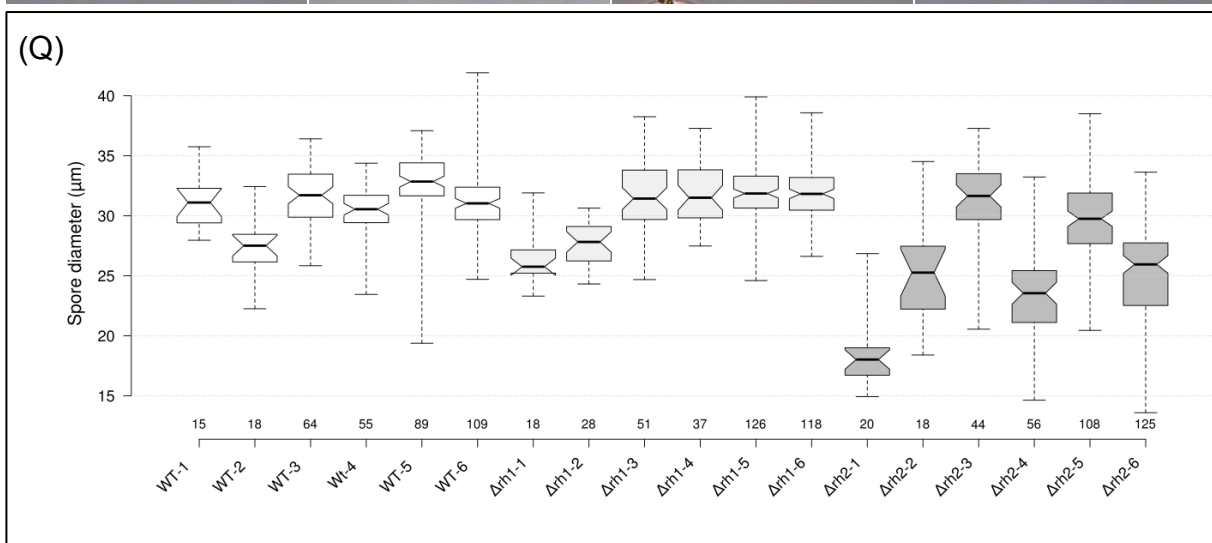

**Fig S13 Mature  $\Delta rh2$  spores display a heterogeneous shape and size compared to WT and  $\Delta rh1$  spores. a-d: wild type spores. e-h:  $\Delta rh1$  spores. i-p:  $\Delta rh2$  spores. Bar: 25  $\mu\text{m}$ . q: Box plot diagram displaying the spore diameter distribution for six independent sporophytes of each strain. Center lines shows the diameter median value; box limits indicates the 25<sup>th</sup> and 75 percentiles as determined by R software, whiskers extend to minimum and maximum value. n value for each spore set is indicated along the y axis. The plot was generated using the online tool BoxPlotR: a web-tool for generation of box plots (<http://shiny.chemgrid.org/boxplotr/>).**

(A)

**p<sub>hel1</sub>\_GFP\_KI**

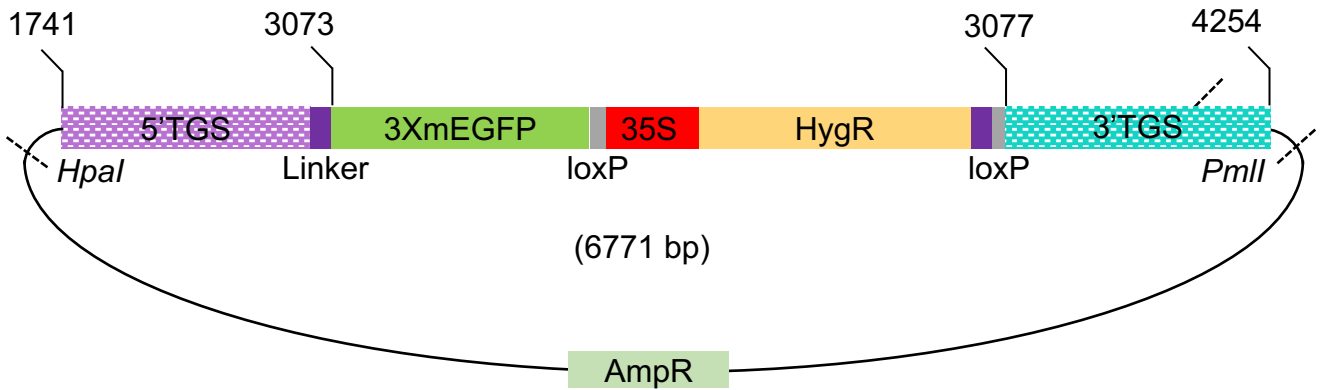

(B)

**pBHRF\_<sub>hel1</sub>\_KO**

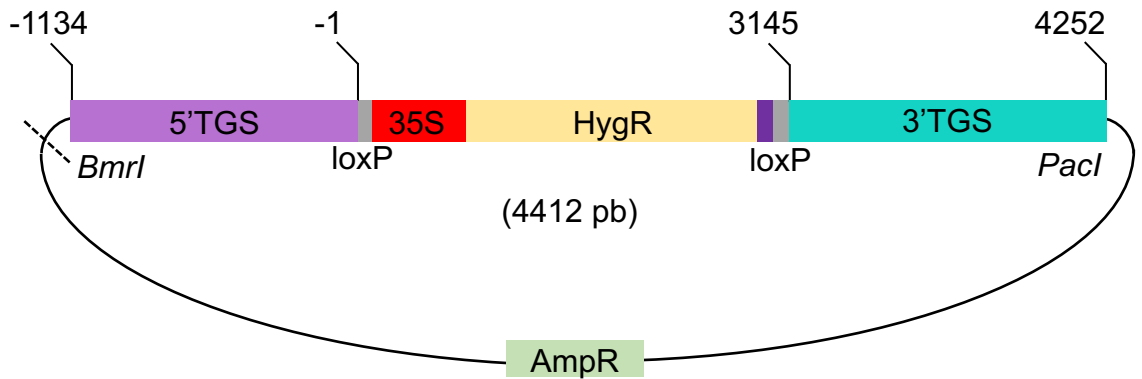

(C)

**pBNRF\_<sub>hel2</sub>\_KO**

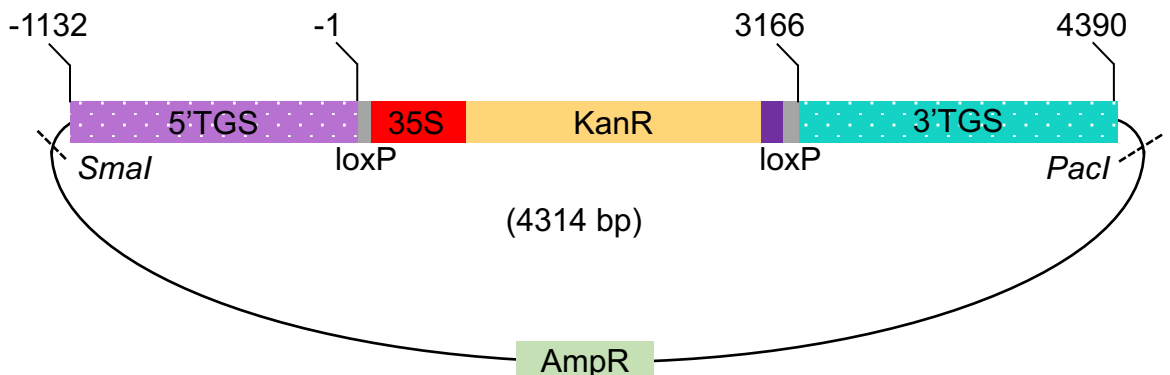

**Fig S14 Cartoon representation of the knockout and knock-in plasmid vectors.** Plasmids **a** p<sub>hel1</sub>\_GFP\_KI, **b** pBHRF\_<sub>hel1</sub>\_KO and **c** pBNRF\_<sub>hel2</sub>\_KO were constructed for the purpose of this study. The numbering corresponds to the nucleotide position relative to the A<sup>1</sup>TG start site in Pp3c20\_20710 (**a** and **b**) and Pp3c10\_20840 (**c**) genomic sequences. The restriction enzymes used to linearize the plasmids prior to *P. patens* transformation are indicated with dashed lines. The base pair (bp) numbers in brackets correspond to the sizes of the resulting double restriction-digest fragment. TGS = targeting sequence. Figure not drawn to scale.
